# Supplementary material for: Wisconsin microbiome study, a cross-sectional investigation of dietary fibre, microbiome composition and antibiotic-resistant organisms: rationale and methods
Source: PubMed Central journal article supplement (PMC5875638; doi:10.1136/bmjopen-2017-019450), 2018-03-27

Multi-Drug  
Resistant  
Organisms-related  
data in the Survey  
of the Health of  
Wisconsin  
instruments

Please refer to the index below to find SHOW instruments that have data related to MDRO. All these instruments can be found in subsequent pages of this document in the order that they are listed here.

SAQ: Self-Administered Questionnaire

CAPI: Computer-Assisted Personal Interview

|     | <b>Instrument</b> | <b>Description</b>                              | <b>Details</b>                                                                                                     | <b>Mode</b> |
|-----|-------------------|-------------------------------------------------|--------------------------------------------------------------------------------------------------------------------|-------------|
| 1.  | ALQ               | Alcohol                                         | History of drinking alcoholic beverages                                                                            | SAQ         |
| 2.  | ANX               | Animal Exposure                                 | Time spent on a farm and with farm animals                                                                         | SAQ         |
| 3.  | HHQ               | Health History Questionnaire                    | History of medical conditions, diabetes complications, questions on comorbidities; HHQ194, HHQ580, HHQ581          | CAPI        |
| 19. | HMH               | Household Health History (Microbiome Household) | Healthy history information regarding a participant's household that may influence his/her microbiome              | SAQ         |
| 20. | HMI               | Your Health History (Microbiome Individual)     | Health history information that may influence a participant's microbiome                                           | SAQ         |
| 24. | HOQ               | Housing Characteristics                         | HOQ250_2: What kind of pets do you keep inside your home now?                                                      | SAQ         |
| 27. | IUQ               | Insurance, Access, and Utilization              | Questions on hospital stays; IUQ190 IUQ192, IUQ194                                                                 | CAPI        |
| 40. | LAB               | LAB/Sample Collection                           | LAB300, LAB310, LAB320, LAB330, LAB340, LAB341, LAB342, LAB350, LAB360, LAB370, LAB380, LAB390, LAB400             | CAPI        |
| 52. | OCQ               | Occupation                                      | Work in healthcare setting; OCQ185, OCQ186                                                                         | CAPI        |
| 58. | PHQ               | Depression                                      | Two-item depression screener; derived depression diagnosis and score: PHQ2_DX, PHQ2_SCORE                          | CAPI        |
| 60. | PTSD              | Post-Traumatic Stress Disorder                  | Abbreviated PTSD Checklist – Civilian version; derived PTSD diagnosis and score: PTSD6_DX_SCORE, PTSD6_TOTAL_SCORE | CAPI        |
| 61. | RXQ               | Medications                                     | Number of medications, antibiotics                                                                                 | CAPI        |
| 71. | SMQ               | Smoking                                         | Smoking history                                                                                                    | SAQ         |

## Alcohol Consumption

The next set of questions are about drinking alcoholic beverages. Alcoholic beverages include liquor (such as whiskey or gin), beer, wine, wine coolers, and any other type of drink with alcohol in it.

1. How many glasses of wine or wine coolers do you usually have per week?

*This means 5 ounce glasses of wine or 12 ounce bottles of wine cooler (size of a regular can of soda).*

Enter number of glasses:

ALQ160\_R2 FMT\_NUMERIC

2. How many glasses, bottles, or cans of beer do you usually have per week?

*This means 12 ounce glasses, bottles, or cans of beer (size of a regular can of soda).*

Enter number of cans, glasses, or bottles:

ALQ170\_R2 FMT\_NUMERIC

3. How many drinks of hard liquor do you usually have per week?

*This means one-and-a-half ounce shots.*

Enter number of hard liquor drinks  
(e.g. 1.5 ounce shots):

ALQ180\_R2 FMT\_NUMERIC

4. In the past 12 months, on how many days did you have 5 or more drinks of any alcoholic beverage?

*If you had 5 or more alcoholic beverages about 1 day per week on average, enter 52. If you usually did this about 2 times per month, enter 24.*

*If there was no day in the past 12 months where you had 5 or more drinks, enter 0.*

Enter number of days:

ALQ130\_R3 FMT\_NUMERIC

5. Was there ever a time in your life when you drank 5 or more drinks of any kind of alcoholic beverage almost every day?

- Yes  
 No

ALQ120\_R3 FMT\_YES\_NO

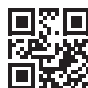

## Animal Exposure

Now we would like to ask you some questions about time you have spent on a farm and with farm animals.

*A farm is defined as any establishment from which \$1,000 or more of agricultural products were produced or sold, or would normally have been sold, during the year.*

- |                                                                                                                                        | Yes                   | No                    | Don't know            |
|----------------------------------------------------------------------------------------------------------------------------------------|-----------------------|-----------------------|-----------------------|
| 1. Do you live on a farm? .....                                                                                                        | <input type="radio"/> | <input type="radio"/> | <input type="radio"/> |
|                                                                                                                                        | ANX010                | FMT_YES_NO.           |                       |
| 2. Do you live on a hobby farm (i.e., a small farm operated for pleasure or supplemental income rather than for primary income)? ..... | <input type="radio"/> | <input type="radio"/> | <input type="radio"/> |
|                                                                                                                                        | ANX020                | FMT_YES_NO.           |                       |
| 3. At any time in the <u>past year</u> , did you work, paid or unpaid, on a farm? .....                                                | <input type="radio"/> | <input type="radio"/> | <input type="radio"/> |
|                                                                                                                                        | ANX030                | FMT_YES_NO.           |                       |

If you filled in only “No” or “Don’t know” in response to questions 1 through 3, you are done with the Animal Exposure questionnaire. Please go to question 1, page 40. →

If you filled in “Yes” in response to any questions 1 through 3, please continue with question 4. ↓

4. What kinds of animals are kept on the farm on which you live or have worked (*fill in all that apply*)?
- |                                            |                                                           |                 |
|--------------------------------------------|-----------------------------------------------------------|-----------------|
| <input type="radio"/> Beef cattle ANX040_a | <input type="radio"/> Pigs ANX040_h                       |                 |
| <input type="radio"/> Dairy cows ANX040_b  | <input type="radio"/> Goats for dairy ANX040_i            |                 |
| <input type="radio"/> Horses ANX040_c      | <input type="radio"/> Goats for meat ANX040_j             | a through l are |
| <input type="radio"/> Donkeys ANX040_d     | <input type="radio"/> Sheep ANX040_k                      | FMT_YES_NO.     |
| <input type="radio"/> Llamas ANX040_e      | <input type="radio"/> Other: <i>Print below.</i> ANX040_l |                 |
| <input type="radio"/> Chickens ANX040_f    | ANX040_m \$FMT_CHAR.                                      |                 |
| <input type="radio"/> Ostriches ANX040_g   |                                                           |                 |

5. In the past year, were antibiotics given to any of the animals raised on the farm on which you lived or worked?
- |                           |                          |                                  |                    |
|---------------------------|--------------------------|----------------------------------|--------------------|
| <input type="radio"/> Yes | <input type="radio"/> No | <input type="radio"/> Don't know | ANX050 FMT_YES_NO. |
|---------------------------|--------------------------|----------------------------------|--------------------|

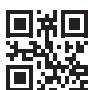

**HEALTH HISTORY PART I**

HHQ100pre This next questionnaire is about your personal health history.

I will ask you if a health professional ever told you that you have or had certain common health problems in your lifetime and if so, how old you were when these occurred.

For some health problems I will ask you about the treatment you received. If there is any question that you don't know the answer to let me know. If there is any question that makes you uncomfortable you may ask me to skip the question.

**INTERVIEWER: HIT ENTER TO CONTINUE**

HHQ100 Has a doctor or other health professional ever told you that you had congestive heart failure?  
**HHQ100 FMT\_YES\_NO.**

<1> YES

<2> NO

<d> DON'T KNOW

<r> REFUSED

HHQ120 (Has a doctor or other health professional ever told you that you had...)

...**angina**, also called **angina pectoris**?

**HHQ120 FMT\_YES\_NO.**

<1> YES

<2> NO

<d> DON'T KNOW

<r> REFUSED

HHQ130 (Has a doctor or other health professional ever told you that you had...)

...a **heart attack**?

**HHQ130 FMT\_YES\_NO.**

<1> YES

<2> NO (skip to HHQ140)

<d> DON'T KNOW (skip to HHQ140)

<r> REFUSED (skip to HHQ140)

HHQ131 How many heart attacks have you had?

**HHQ131 FMT\_NUMERIC.**

<1-99>

**HEALTH HISTORY**

<d> DON'T KNOW  
<r> REFUSED

HHQ132 How old were you when you were first told you had a heart attack?

**HHQ132 FMT\_NUMERIC.**

<1-130> YEARS

<d> DON'T KNOW  
<r> REFUSED

HHQ140 Have you ever had heart surgery?

**HHQ140 FMT\_YES\_NO.**

<1> YES  
<2> NO (skip to HHQ150)

<d> DON'T KNOW (skip to HHQ150)  
<r> REFUSED (skip to HHQ150)

HHQ141 Which of the following types of heart surgery have you had?

**(INTERVIEWER: HAND CARD. ENTER ALL THAT APPLY.)**

<1> **BYPASS SURGERY**  
<2> **ANGIOPLASTY**  
<3> **VALVE SURGERY**  
<4> **PACEMAKER**  
<5> OTHER (SPECIFY)

<d> DON'T KNOW  
<r> REFUSED

|                                |                     |                     |
|--------------------------------|---------------------|---------------------|
| <b>1<sup>st</sup> RESPONSE</b> | <b>HHQ141_A</b>     | <b>FMT_HHQ141_.</b> |
| <b>2<sup>nd</sup> RESPONSE</b> | <b>HHQ141_B</b>     | <b>FMT_HHQ141_.</b> |
| <b>3<sup>rd</sup> RESPONSE</b> | <b>HHQ141_C</b>     | <b>FMT_HHQ141_.</b> |
| <b>4<sup>th</sup> RESPONSE</b> | <b>HHQ141_D</b>     | <b>FMT_HHQ141_.</b> |
| <b>5<sup>th</sup> RESPONSE</b> | <b>HHQ141_E</b>     | <b>FMT_HHQ141_.</b> |
| <b>OTHER RESPONSE</b>          | <b>HHQ141_OTHER</b> | <b>\$FMT_CHAR.</b>  |

HIT 'X' TO EXIT

HHQ150 Has a doctor or other health professional ever told you that you had a transient ischemic attack (TIA)?

**HHQ150 FMT\_YES\_NO.**

<1> YES  
<2> NO

<d> DON'T KNOW <r> REFUSED

**HEALTH HISTORY**

HHQ160 (Has a doctor or other health professional ever told you that you had...)

...a **stroke**?

**HHQ160 FMT\_YES\_NO.**

<1> YES

<2> NO (skip to HHQ180)

<d> DON'T KNOW (skip to HHQ180)

<r> REFUSED (skip to HHQ180)

HHQ162 How old were you when you were first told that you had a stroke?

**HHQ162 FMT\_NUMERIC.**

<1-130> YEARS

<d> DON'T KNOW

<r> REFUSED

HHQ180 (Has a doctor or other health professional ever told you that you had...)

...**high cholesterol/hyperlipidemia**?

**HHQ180 FMT\_YES\_NO.**

<1> YES

<2> NO (skip to HHQ190)

<d> DON'T KNOW (skip to HHQ190)

<r> REFUSED (skip to HHQ190)

HHQ183 How is your high cholesterol/hyperlipidemia currently being treated? List all that apply.

**(INTERVIEWER: HAND CARD. ENTER ALL THAT APPLY)**

- <1> NO TREATMENT
- <2> PRESCRIBED MEDICINE
- <3> WEIGHT CONTROL/LOSS
- <4> EXERCISE
- <5> SPECIAL DIET
- <6> OTHER (SPECIFY)

<d> DON'T KNOW

<r> REFUSED

|                                |                 |                     |
|--------------------------------|-----------------|---------------------|
| <b>1<sup>st</sup> RESPONSE</b> | <b>HHQ183_A</b> | <b>FMT_HHQ183_.</b> |
| <b>2<sup>nd</sup> RESPONSE</b> | <b>HHQ183_B</b> | <b>FMT_HHQ183_.</b> |
| <b>3<sup>rd</sup> RESPONSE</b> | <b>HHQ183_C</b> | <b>FMT_HHQ183_.</b> |

**HEALTH HISTORY**

|                                |                     |                     |
|--------------------------------|---------------------|---------------------|
| <b>4<sup>th</sup> RESPONSE</b> | <b>HHQ183_D</b>     | <b>FMT_HHQ183_.</b> |
| <b>5<sup>th</sup> RESPONSE</b> | <b>HHQ183_E</b>     | <b>FMT_HHQ183_.</b> |
| <b>OTHER RESPONSE</b>          | <b>HHQ183_OTHER</b> | <b>\$FMT_CHAR.</b>  |

HHQ190 (Has a doctor or other health professional ever told you that you had...)

...diabetes?

**HHQ190 FMT\_YES\_NO.**

<1> YES  
<2> NO (skip to HHQ200)

<d> DON'T KNOW (skip to HHQ200)  
<r> REFUSED (skip to HHQ200)

HHQ191 Which type of diabetes have you had?

**(INTERVIEWER: PICK ONLY ONE)**

**HHQ191 FMT\_HHQ191\_.**

<1> TYPE I  
<2> TYPE II  
<3> ONLY WHEN PREGNANT  
<4> BORDERLINE DIABETES WHICH IS SOMETIMES CALLED PRE-DIABETES

<d> DON'T KNOW  
<r> REFUSED

HHQ192 How old were you when you were first told you had diabetes?

**HHQ192 FMT\_NUMERIC.**

<1-130> YEARS

<d> DON'T KNOW  
<r> REFUSED

HHQ193 How is your diabetes currently being treated or controlled?

**(INTERVIEWER: HAND CARD. ENTER ALL THAT APPLY.)**

<1> NO TREATMENT  
<2> INSULIN  
<3> ORAL ANTI-DIABETICS (PILLS)  
<4> WEIGHT CONTROL/LOSS  
<5> EXERCISE  
<6> SPECIAL DIET  
<7> OTHER (SPECIFY)



**HEALTH HISTORY**

<d> DON'T KNOW  
<r> REFUSED

|                       |                     |                     |
|-----------------------|---------------------|---------------------|
| <b>1st RESPONSE</b>   | <b>HHQ193_A</b>     | <b>FMT_HHQ193_.</b> |
| <b>2nd RESPONSE</b>   | <b>HHQ193_B</b>     | <b>FMT_HHQ193_.</b> |
| <b>3rd RESPONSE</b>   | <b>HHQ193_C</b>     | <b>FMT_HHQ193_.</b> |
| <b>4th RESPONSE</b>   | <b>HHQ193_D</b>     | <b>FMT_HHQ193_.</b> |
| <b>5th RESPONSE</b>   | <b>HHQ193_E</b>     | <b>FMT_HHQ193_.</b> |
| <b>6th RESPONSE</b>   | <b>HHQ193_F</b>     | <b>FMT_HHQ193_.</b> |
| <b>OTHER RESPONSE</b> | <b>HHQ193_OTHER</b> | <b>\$FMT_CHAR.</b>  |

HHQ194 Has a doctor or other health care professional ever told you that you had any of the following complications associated with diabetes?

**(INTERVIEWER: HAND CARD. ENTER ALL THAT APPLY.) ENTER X TO EXIT.**

<1> NEUROPATHY (NERVE DISEASE)  
<2> RETINOPATHY (EYE DISEASE)  
<3> NEPHROPATHY (KIDNEY DISEASE)  
<4> OTHER (SPECIFY)

<d> DON'T KNOW  
<r> REFUSED

|                       |                     |                     |
|-----------------------|---------------------|---------------------|
| <b>1st RESPONSE</b>   | <b>HHQ194_A</b>     | <b>FMT_HHQ194_.</b> |
| <b>2nd RESPONSE</b>   | <b>HHQ194_B</b>     | <b>FMT_HHQ194_.</b> |
| <b>3rd RESPONSE</b>   | <b>HHQ194_C</b>     | <b>FMT_HHQ194_.</b> |
| <b>4th RESPONSE</b>   | <b>HHQ194_D</b>     | <b>FMT_HHQ194_.</b> |
| <b>OTHER RESPONSE</b> | <b>HHQ194_OTHER</b> | <b>\$FMT_CHAR.</b>  |

HHQ200 (Has a doctor or other health professional ever told you that you had...)

...high blood pressure/hypertension?

**HHQ200 FMT\_YES\_NO.**

<1> YES  
<2> NO (skip to HHQ210)

<d> DON'T KNOW (skip to HHQ210)  
<r> REFUSED (skip to HHQ210)

HHQ202 How old were you when you were first told that you had **high blood pressure/hypertension?**

**HHQ202 FMT\_NUMERIC.**

<1-130> YEARS

**HEALTH HISTORY**

<d> DON'T KNOW  
<r> REFUSED

HHQ203 How is your **high blood pressure/hypertension** currently treated? List all that apply.

**(INTERVIEWER: HAND CARD. ENTER ALL THAT APPLY.)**

<1> NO TREATMENT  
<2> PRESCRIBED MEDICINE  
<3> WEIGHT CONTROL/LOSS  
<4> EXERCISE  
<5> SPECIAL DIET  
<6> OTHER (SPECIFY)

<d> DON'T KNOW  
<r> REFUSED

HIT 'X' TO EXIT

|                                |                     |                     |
|--------------------------------|---------------------|---------------------|
| <b>1<sup>st</sup> RESPONSE</b> | <b>HHQ203_A</b>     | <b>FMT_HHQ203_.</b> |
| <b>2<sup>nd</sup> RESPONSE</b> | <b>HHQ203_B</b>     | <b>FMT_HHQ203_.</b> |
| <b>3<sup>rd</sup> RESPONSE</b> | <b>HHQ203_C</b>     | <b>FMT_HHQ203_.</b> |
| <b>4<sup>th</sup> RESPONSE</b> | <b>HHQ203_D</b>     | <b>FMT_HHQ203_.</b> |
| <b>5<sup>th</sup> RESPONSE</b> | <b>HHQ203_E</b>     | <b>FMT_HHQ203_.</b> |
| <b>OTHER RESPONSE</b>          | <b>HHQ203_OTHER</b> | <b>\$FMT_CHAR.</b>  |

HHQ210 (Has a doctor or other health professional ever told you that you have...)

...asthma?

**HHQ210 FMT\_YES\_NO.**

<1> YES  
<2> NO (skip to HHQ230r2)

<d> DON'T KNOW (skip to HHQ230r2)  
<r> REFUSED (skip to HHQ230r2)

HHQ212 How old were you when you were first told you have asthma?

**HHQ212 FMT\_NUMERIC.**

<1-130> YEARS

<d> DON'T KNOW  
<r> REFUSED

HHQ214 Do you still have asthma?

**HHQ214 FMT\_YES\_NO.**

<1> YES

**HEALTH HISTORY**

&lt;2&gt; NO

&lt;d&gt; DON'T KNOW

&lt;r&gt; REFUSED

HHQ215 During the last 12 months, have you had an episode of asthma or an asthma attack?

**HHQ215 FMT\_YES\_NO.**

&lt;1&gt; YES

&lt;2&gt; NO

&lt;d&gt; DON'T KNOW

&lt;r&gt; REFUSED

HHQ216 During the past 12 months, have you visited an emergency room or urgent care because of your asthma?

**HHQ216 FMT\_YES\_NO.**

&lt;1&gt; YES

&lt;2&gt; NO

&lt;d&gt; DON'T KNOW

&lt;r&gt; REFUSED

HHQ217 How is your asthma currently being treated or controlled?

**(INTERVIEWER: HAND CARD. ENTER ALL THAT APPLY.)**

&lt;1&gt; USE NOTHING/NO TREATMENT

&lt;2&gt; INHALED BRONCHODILATOR

&lt;3&gt; INHALED STERIOD

&lt;4&gt; ORAL MEDICATION

&lt;5&gt; INJECTED MEDICATIONS

&lt;6&gt; CONTROLLING ALLERGIES AND/OR ASTHMA TRIGGERS

&lt;7&gt; WEIGHT CONTROL/LOSS/EXERCISE/SPECIAL DIET

&lt;8&gt; OTHER (SPECIFY)

&lt;d&gt; DON'T KNOW

&lt;r&gt; REFUSED

|                                |                     |                     |
|--------------------------------|---------------------|---------------------|
| <b>1<sup>st</sup> RESPONSE</b> | <b>HHQ217_A</b>     | <b>FMT_HHQ217_.</b> |
| <b>2<sup>nd</sup> RESPONSE</b> | <b>HHQ217_B</b>     | <b>FMT_HHQ217_.</b> |
| <b>3<sup>rd</sup> RESPONSE</b> | <b>HHQ217_C</b>     | <b>FMT_HHQ217_.</b> |
| <b>4<sup>th</sup> RESPONSE</b> | <b>HHQ217_D</b>     | <b>FMT_HHQ217_.</b> |
| <b>5<sup>th</sup> RESPONSE</b> | <b>HHQ217_E</b>     | <b>FMT_HHQ217_.</b> |
| <b>6<sup>th</sup> RESPONSE</b> | <b>HHQ217_F</b>     | <b>FMT_HHQ217_.</b> |
| <b>7<sup>th</sup> RESPONSE</b> | <b>HHQ217_G</b>     | <b>FMT_HHQ217_.</b> |
| <b>OTHER RESPONSE</b>          | <b>HHQ217_OTHER</b> | <b>\$FMT_CHAR.</b>  |

**HEALTH HISTORY**

HHQ218 During the past 30 days, how many days did you take a prescription asthma medication to PREVENT an asthma attack from occurring?

**HHQ218 FMT\_HHQ218\_.**

- <1> NEVER
- <2> 1-14 DAYS
- <3> 15-24 DAYS
- <4> 25-30 DAYS
  
- <d> DON'T KNOW
- <r> REFUSED

HHQ219 During the past 30 days, how many days did you take a prescription asthma medication DURING AN ASTHMA ATTACK to stop it?

**HHQ219 FMT\_HHQ219\_.**

- <0> NEVER
- <1> 1-4 TIMES
- <2> 5-14 TIMES
- <3> 15-29 TIMES
- <4> 30-59 TIMES
- <5> 60-99 TIMES
- <6> MORE THAN 100 TIMES
  
- <d> DON'T KNOW
- <r> REFUSED

HHQ230r2 (Has a doctor or other health professional ever told you that you had...)

**...chronic bronchitis or emphysema?**

**HHQ230\_R2 FMT\_YES\_NO.**

- <1> YES
- <2> NO
  
- <d> DON'T KNOW
- <r> REFUSED

HHQ270 (Has a doctor or other health professional ever told you that you had...)

**...allergies or hay fever?**

**HHQ270 FMT\_YES\_NO.**

- <1> YES
- <2> NO **(End of HHQ; GO TO SIQ230)**
  
- <d> DON'T KNOW **(End of HHQ; GO TO SIQ230)**

**HEALTH HISTORY**

<r> REFUSED (End of HHQ; GO TO SIC230)

HHQ271 Which types of allergies have you had?

**(INTERVIEWER: HAND CARD. ENTER ALL THAT APPLY)**

- <1> TREES, GRASSES, PLANTS, POLLEN
- <2> MEDICINES
- <3> FOODS
- <4> CHEMICALS/SCENTS
- <5> MOLDS
- <6> ANIMALS/DANDER
- <7> DUST MITES
- <10> STINGING INSECTS
- <11> OTHER (SPECIFY)

<d> DON'T KNOW

<r> REFUSED

|                          |              |              |
|--------------------------|--------------|--------------|
| 1 <sup>st</sup> RESPONSE | HHQ271_A     | FMT_HHQ271_. |
| 2 <sup>nd</sup> RESPONSE | HHQ271_B     | FMT_HHQ271_. |
| 3 <sup>rd</sup> RESPONSE | HHQ271_C     | FMT_HHQ271_. |
| 4 <sup>th</sup> RESPONSE | HHQ271_D     | FMT_HHQ271_. |
| 5 <sup>th</sup> RESPONSE | HHQ271_E     | FMT_HHQ271_. |
| 6 <sup>th</sup> RESPONSE | HHQ271_F     | FMT_HHQ271_. |
| 7 <sup>th</sup> RESPONSE | HHQ271_G     | FMT_HHQ271_. |
| 8 <sup>th</sup> RESPONSE | HHQ271_H     | FMT_HHQ271_. |
| 9 <sup>th</sup> RESPONSE | HHQ271_I     | FMT_HHQ271_. |
| OTHER RESPONSE           | HHQ271_OTHER | \$FMT_CHAR.  |

HHQ276 Do you still have allergies or hay fever?

**HHQ276 FMT\_YES\_NO.**

<1> YES

<2> NO

<d> DON'T KNOW

<r> REFUSED

**(SIQ230 and SIQ231 for MEN >=40 YEARS OLD. If <40, skip to SDQ010 below)**

SIQ230 Have you ever had a prostate blood test, PSA test, and/or a rectal exam?

**SIQ230 FMT\_YES\_NO.**

<1> YES

<2> NO (Skip to SDQ010)

<d> DON'T KNOW (Skip to SDQ010)

**HEALTH HISTORY**

<r> REFUSED (Skip to SDQ010)

SIQ231 Within how many years?

**SIQ231 FMT\_NUMERIC.**

**INTERVIEWER: IF LESS THAN 1 YEAR, ENTER 1 FOR YEARS**

<1-130> YEARS

<d> DON'T KNOW

<r> REFUSED

SDQ010 At the **present time**, would you say your eyesight, with glasses or contact lenses, if you wear them, is excellent, good, fair, poor or very poor?

**SDQ010 FMT\_EGFPVP.**

<1> EXCELLENT

<2> GOOD

<3> FAIR

<4> POOR

<5> VERY POOR

<d> DON'T KNOW

<r> REFUSED

SDQ270 Overall, how would you describe the condition of your teeth?

Would you say excellent, very good, good, fair or poor?

**SDQ270 FMT\_EVGGFP.**

<1> EXCELLENT

<2> VERY GOOD

<3> GOOD

<4> FAIR

<5> POOR

<d> DON'T KNOW

<r> REFUSED

SDQ340 Have you ever been diagnosed by a dentist as having gum disease?

**SDQ340 FMT\_YES\_NO.**

<1> YES

<2> NO

<d> DON'T KNOW

<r> REFUSED

**HEALTH HISTORY**

SDQ360 During the past 12 months, was there a time when you needed dental care but did not get it at that time?

**SDQ360 FMT\_YES\_NO.**

- <1> YES  
 <2> NO (Skip to HHQ400)  
 <d> DON'T KNOW (Skip to HHQ400)  
 <r> REFUSED (Skip to HHQ400)

SDQ361 What were the reasons that you could not get the dental care you needed?

**(INTERVIEWER: ENTER ALL THAT APPLY. HAND CARD)**

- <1> COULD NOT AFFORD THE COST  
 <2> DID NOT WANT TO SPEND THE MONEY  
 <3> DO NOT HAVE INSURANCE  
 <4> INSURANCE DID NOT COVER RECOMMENDED PROCEDURES  
 <5> INSURANCE ONLY COVERS A PORTION OF THE COST  
 <6> DENTAL OFFICE IS TOO FAR AWAY  
 <7> DENTAL OFFICE IS NOT OPEN AT CONVENIENT TIMES  
 <8> ANOTHER DENTIST RECOMMENDED NOT DOING IT  
 <9> AFRAID, OR DO NOT LIKE DENTISTS  
 <10> UNABLE TO TAKE TIME OFF FROM WORK  
 <11> TOO BUSY  
 <12> I DID NOT THINK ANYTHING SERIOUS WAS WRONG--EXPECTED DENTAL PROBLEMS TO GO AWAY  
 <13> THE DENTIST WOULD NOT ACCEPT MY INSURANCE  
 <14> OTHER (SPECIFY)  
 <d> DON'T KNOW  
 <r> REFUSED

HIT 'x' TO EXIT

|                           |          |              |
|---------------------------|----------|--------------|
| 1 <sup>st</sup> response  | SDQ361_A | FMT_SDQ361_. |
| 2 <sup>nd</sup> response  | SDQ361_B | FMT_SDQ361_. |
| 3 <sup>rd</sup> response  | SDQ361_C | FMT_SDQ361_. |
| 4 <sup>th</sup> response  | SDQ361_D | FMT_SDQ361_. |
| 5 <sup>th</sup> response  | SDQ361_E | FMT_SDQ361_. |
| 6 <sup>th</sup> response  | SDQ361_F | FMT_SDQ361_. |
| 7 <sup>th</sup> response  | SDQ361_G | FMT_SDQ361_. |
| 8 <sup>th</sup> response  | SDQ361_H | FMT_SDQ361_. |
| 9 <sup>th</sup> response  | SDQ361_I | FMT_SDQ361_. |
| 10 <sup>th</sup> response | SDQ361_J | FMT_SDQ361_. |
| 11 <sup>th</sup> response | SDQ361_K | FMT_SDQ361_. |
| 12 <sup>th</sup> response | SDQ361_L | FMT_SDQ361_. |
| 13 <sup>th</sup> response | SDQ361_M | FMT_SDQ361_. |
| 14 <sup>th</sup> response | SDQ361_N | FMT_SDQ361_. |

**HEALTH HISTORY****Other response    SDQ361\_OTHER    \$FMT\_CHAR.**

HHQ400    Has a doctor or other health professional ever told you that you were overweight?  
**HHQ400    FMT\_YES\_NO.**

- <1>    YES  
 <2>    NO    **(Skip to HHQ480)**
- <d>    DON'T KNOW    **(Skip to HHQ480)**  
 <r>    REFUSED    **(Skip to HHQ480)**

HHQ412    How old were you when you were first told you were overweight?  
**HHQ412    FMT\_NUMERIC.**

- <0-130>    YEARS OLD
- <d>    DON'T KNOW  
 <r>    REFUSED

HHQ480    Has a doctor or other health professional ever told you that you had cancer?  
**HHQ480    FMT\_YES\_NO.**

- <1>    YES  
 <2>    NO    **(Skip to HHQ500int)**
- <d>    DON'T KNOW    **(Skip to HHQ500int)**  
 <r>    REFUSED    **(Skip to HHQ500int)**

HHQ481    Which types of cancer on this card have you had?

**(INTERVIEWER: ENTER ALL THAT APPLY, ENTER 'x' WHEN DONE)**

- |                                       |                                  |
|---------------------------------------|----------------------------------|
| <10>    BLADDER                       | <27>    NERVOUS SYSTEM           |
| <11>    BLOOD                         | <28>    OVARY/OVARIAN            |
| <12>    BONE                          | <29>    PANCREAS/PANCREATIC      |
| <13>    BRAIN                         | <30>    PROSTATE                 |
| <14>    BREAST                        | <31>    RECTUM/RECTAL            |
| <15>    CERVIX/CERVICAL               | <32>    SKIN (NON MELANOMA)      |
| <16>    COLON                         | <33>    SKIN (UNKNOWN)           |
| <17>    ESOPHAGUS                     | <34>    SOFT TISSUE (MUSCLE/FAT) |
| <18>    GALLBLADDER                   | <35>    STOMACH                  |
| <19>    KIDNEY                        | <36>    TESTES/TESTICULAR        |
| <20>    LARYNX/WINDPIPE               | <37>    THYROID                  |
| <21>    LEUKEMIA                      | <38>    UTERUS/UTERINE           |
| <22>    LIVER                         | <39>    OTHER                    |
| <23>    LUNG                          |                                  |
| <24>    LYMPHOMA/<br>HODGKINS DISEASE | <66> <b>MORE THAN 3</b>          |
| <25>    MELANOMA                      | <d>    DON'T KNOW                |



**HEALTH HISTORY**

<26> MOUTH/TONGUE/LIP <r> REFUSED

|              |              |
|--------------|--------------|
| HHQ481_A     | FMT_HHQ481_. |
| HHQ481_B     | FMT_HHQ481_. |
| HHQ481_C     | FMT_HHQ481_. |
| HHQ481_D     | FMT_HHQ481_. |
| HHQ481_OTHER | \$FMT_CHAR.  |

HHQ500int Now we will ask you questions about certain illnesses that have occurred in your biological or blood relatives--- your grandparents, parents, aunts, uncles, brothers, sisters, and children. Please do not include half or step sisters or brothers, cousins, nieces, nephews, or grandchildren. Please include both living and deceased relatives.

**INTERVIEWER: HIT ENTER TO CONTINUE**

HHQ510\_R2 Were any of your biological or blood relatives ever told by a doctor or other health professional that they had diabetes?

**HHQ510 FMT\_YES\_NO.**

<1> YES

<2> NO

<d> DON'T KNOW

<r> REFUSED

HHQ520\_R2 (Were any of your biological or blood relatives ever told by a doctor or other health professional that they had...)

...Alzheimer's disease or dementia?

**HHQ520 FMT\_YES\_NO.**

<1> YES

<2> NO

<d> DON'T KNOW

<r> REFUSED

HHQ530\_R2 (Were any of your biological or blood relatives ever told by a doctor or other health professional that they had...)

...asthma?

**HHQ530 FMT\_YES\_NO.**

<1> YES

<2> NO

**HEALTH HISTORY**

<d> DON'T KNOW  
<r> REFUSED

HHQ550\_R2 (Were any of your biological or blood relatives ever told by a doctor or other health professional that they had...)

...high blood pressure or hypertension?

**HHQ550 FMT\_YES\_NO.**

<1> YES  
<2> NO

<d> DON'T KNOW  
<r> REFUSED

HHQ570\_R3 (Were any of your biological or blood relatives ever told by a doctor or other health professional that they had...)

... a heart attack or a stroke?

**HHQ570\_R2 FMT\_YES\_NO.**

<1> YES  
<2> NO **(Skip to HHQ580new)**

<d> DON'T KNOW **(Skip to HHQ580new)**  
<r> REFUSED **(Skip to HHQ580new)**

HHQ572\_R3 What was the youngest age at which any biological or blood relative was first diagnosed with heart attack or a stroke?

**HHQ572\_R2 FMT\_NUMERIC.**

<0-130> YEARS OLD

<d> DON'T KNOW  
<r> REFUSED

HHQ580new Has a doctor or other health professional ever told you that you had any of the following?

**(INTERVIEWER: HAND CARD. ENTER ALL THAT APPLY, ENTER 'xx' FOR NONE OR FOR NO FURTHER DIAGNOSES)**

|                              |                         |
|------------------------------|-------------------------|
| <a> ALCOHOL ABUSE            | <t> KIDNEY STONES       |
| <b> ALZHEIMER'S DISEASE      | <u> LEARNING DISABILITY |
| <c> ANEMIA                   | <ua> LIVER DISEASE      |
| <d> ANXIETY                  | <v> LYME DISEASE        |
| <e> AUTISM SPECTRUM DISORDER | <w> MIGRAINE HEADACHE   |
| IMPAIRMENT                   | <x> MILD COGNITIVE      |

**HEALTH HISTORY**

|      |                             |      |                                          |
|------|-----------------------------|------|------------------------------------------|
| <f>  | CELIAC DISEASE              | <y>  | MULTIPLE SCLEROSIS                       |
| <g>  | CHLAMYDIA                   | <z>  | OSTEOARTHRITIS                           |
| <h>  | CROHN'S DISEASE             | <aa> | OSTEOPOROSIS                             |
| <i>  | CHRONIC KIDNEY DISEASE      | <bb> | PARKINSON'S DISEASE                      |
| <j>  | DEPRESSION                  | <cc> | POST TRAUMATIC STRESS<br>DISORDER (PTSD) |
| <k>  | DRUG ABUSE                  | <dd> | PSORIASIS                                |
| <l>  | ECZEMA/DERMATITIS           | <ee> | REFLUX/GERD                              |
| <m>  | EPILEPSY                    | <ff> | RHEUMATOID ARTHRITIS                     |
| <n>  | GONORRHEA                   | <gg> | SHINGLES OR CHICKEN<br>POX               |
| <oa> | HEPATITIS A                 | <hh> | SICKLE CELL DISEASE                      |
| <ob> | HEPATITIS B                 | <ii> | STOMACH OR INTESTINAL<br>ULCER           |
| <oc> | HEPATITIS C                 | <jj> | SYPHILIS                                 |
| <p>  | HERPES TYPE 1/COLD SORES    | <kk> | TUBERCULOSIS                             |
| <q>  | HIV INFECTION/AIDS          | <ll> | URINARY INCONTINENCE                     |
| <r>  | HUMAN PAPILLOMA VIRUS (HPV) | <mm> | URINARY TRACT INFECTION                  |
| <s>  | IRRITABLE BOWEL SYNDROME    |      |                                          |
| <xd> | DON'T KNOW                  | <xr> | REFUSED                                  |
| <xx> | NO FURTHER DIAGNOSES        |      |                                          |

|          |                |
|----------|----------------|
| HHQ580_A | \$FMT_DISEASE. |
| HHQ580_B | \$FMT_DISEASE. |
| HHQ580_C | \$FMT_DISEASE. |
| HHQ580_D | \$FMT_DISEASE. |
| HHQ580_E | \$FMT_DISEASE. |
| HHQ580_F | \$FMT_DISEASE. |
| HHQ580_G | \$FMT_DISEASE. |
| HHQ580_H | \$FMT_DISEASE. |
| HHQ580_I | \$FMT_DISEASE. |
| HHQ580_J | \$FMT_DISEASE. |
| HHQ580_K | \$FMT_DISEASE. |
| HHQ580_L | \$FMT_DISEASE. |

HHQ581

Has a doctor or other health professional ever told you that you had any of these following conditions?

**(INTERVIEWER: HAND CARD. ENTER ALL THAT APPLY, ENTER 'x' FOR NONE OR FOR NO FURTHER DIAGNOSES)**

|     |                               |     |         |
|-----|-------------------------------|-----|---------|
| <1> | CONNECTIVE TISSUE DISEASE     |     |         |
| <2> | PERIPHERAL VASCULAR DISEASE   |     |         |
| <3> | HEMIPLEGIA                    |     |         |
| <4> | SKIN OR SOFT TISSUE INFECTION |     |         |
| <d> | DON'T KNOW                    | <r> | REFUSED |
| <x> | NO FURTHER DIAGNOSES          |     |         |

|          |                 |
|----------|-----------------|
| HHQ581_A | FMT_HHQ581_R2_. |
|----------|-----------------|

**HEALTH HISTORY**

|          |                 |
|----------|-----------------|
| HHQ581_B | FMT_HHQ581_R2_. |
| HHQ581_C | FMT_HHQ581_R2_. |
| HHQ581_D | FMT_HHQ581_R2_. |

CGQ\_intro There are situations in which people provide regular **unpaid care or assistance** to a family member **including children** or a friend who has **a long-term illness or a disability**.

**INTERVIEWER: HIT ENTER TO CONTINUE**

CGQ010 **In the past 12 months**, did you provide any such care or assistance to a family member or friend living with you or living elsewhere?

**CGQ010 FMT\_YES\_NO.**

<1> YES

<2> NO (Skip to RXQ032pre)

<d> DON'T KNOW (Go to CGQ020)

<r> REFUSED (Skip to RXQ032pre)

CGQ020 Are you currently giving unpaid help to a family member or friend?

**CGQ020 FMT\_YES\_NO.**

<1> YES

<2> NO

<d> DON'T KNOW

<r> REFUSED

## Household Health History

These questions ask about the health history of others, rather than yourself.

- 1. In the past 12 months, have you visited someone staying in a healthcare facility (e.g., hospital, nursing home, inpatient rehabilitation facility)?**

Yes  
 No → Go to question 4 HMH010 FMT\_YES\_NO.  
 Don't know → Go to question 4
- 2. In the past 12 months, did you provide help in caring for the person(s) while they were staying in the healthcare facility? *By help in caring, we mean having physical or hands-on contact with the person.***

Yes       No       Don't know HMH020 FMT\_YES\_NO.
- 3. In the past 12 months, about how many total days did you make a visit to someone who was staying in a healthcare facility (e.g., hospital, nursing home, inpatient rehabilitation facility)?**

total number of days HMH030 FMT\_NUMERIC.
- 4. Has anyone in your household had an infection with a drug-resistant germ?**

Yes       No       Don't know HMH040 FMT\_YES\_NO.
- 5. Has anyone in your household had an infection from a hospital or healthcare setting?**

Yes → *Specify the infection(s) that they had below.* HMH050 FMT\_YES\_NO.

HMH055 \$FMT\_CHAR.

No  
 Don't know
- 6. Have you ever visited a person who was placed in isolation while in a hospital, nursing home, or inpatient rehabilitation facility? *That is, you were required to wear at least a pair of gloves and a gown before seeing them.***

Yes       No       Don't know HMH060 FMT\_YES\_NO.

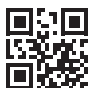

## Your Health History

This next set of questions is about your health history.

1. At the time of your birth, were you delivered by Caesarean section?

- Yes  
 No  
 Don't know
- HMI010 FMT\_YES\_NO.

2a. Were you breastfed as an infant?

- Yes  
 No → Go to question 3  
 Don't know
- HMI020 FMT\_YES\_NO.

2b. For how long were you breastfed?

- months  
 Don't know
- HMI025 FMT\_NUMERIC.

3. Have you ever had surgery on your digestive system (e.g. esophagus, stomach, liver, appendix, small and large intestines, gall bladder, and/or pancreas)?

- Yes  
 No  
 Don't know
- HMI030 FMT\_YES\_NO.

4. In the past 12 months, have you had any of the following medical devices?  
*Fill in all that apply.*

- Urinary catheter  
 Vascular catheter  
 Feeding tube  
 Rectal tube  
 Don't know
- HMI040\_a FMT\_YES\_NO.  
HMI040\_b FMT\_YES\_NO.  
HMI040\_c FMT\_YES\_NO.  
HMI040\_d FMT\_YES\_NO.  
HMI040\_e FMT\_YES\_NO.

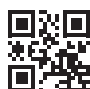

5. In the past 12 months, have you had dialysis treatment?

- Yes
- No
- Don't know

HMI050 FMT\_YES\_NO.

6a. Have you ever been a patient in a nursing home or inpatient rehabilitation facility?

- Yes
- No → Go to question 7a, page 11
- Don't know

HMI060 FMT\_YES\_NO.

6b. How many times were you a patient in a nursing home or inpatient rehabilitation facility?

times

HMI062 FMT\_NUMERIC.

- Don't know

6c. When was your most recent stay in a nursing home or inpatient facility? *Please tell us what month and year this visit began.*

month

HMI065\_m FMT\_NUMERIC.

year

HMI065\_y FMT\_NUMERIC.

6d. What was the approximate length of stay?

days

HMI068 FMT\_NUMERIC.

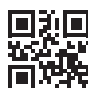

7a. In the past year, have you taken an antibiotic (*a drug used to treat an infection*)?

- Yes
- No → Go to question 8a HMI070 FMT\_YES\_NO.
- Don't know → Go to question 8a

7b. In the table below, please list the name(s) of the antibiotics, the illness or condition for which you took them, and the length of time you took them. *If you were prescribed the same antibiotic more than once in the past year, list it multiple times.*

| <i>Name the antibiotic you took in the last year below:</i>                                                                                                                            | <i>The reason (illness or condition) for taking the medication:</i> | <i>For how many days did you take this antibiotic?</i> |
|----------------------------------------------------------------------------------------------------------------------------------------------------------------------------------------|---------------------------------------------------------------------|--------------------------------------------------------|
| 1. HMI071_a \$FMT_CHAR.                                                                                                                                                                | HMI071_b \$FMT_CHAR.                                                | HMI071_c \$FMT_CHAR.                                   |
| 2. HMI072_a \$FMT_CHAR.                                                                                                                                                                | HMI072_b \$FMT_CHAR.                                                | HMI072_c \$FMT_CHAR.                                   |
| 3. HMI073_a \$FMT_CHAR.                                                                                                                                                                | HMI073_b \$FMT_CHAR.                                                | HMI073_c \$FMT_CHAR.                                   |
| 4. HMI074_a \$FMT_CHAR.                                                                                                                                                                | HMI074_b \$FMT_CHAR.                                                | HMI074_c \$FMT_CHAR.                                   |
| 5. HMI075_a \$FMT_CHAR.                                                                                                                                                                | HMI075_b \$FMT_CHAR.                                                | HMI075_c \$FMT_CHAR.                                   |
| <input type="checkbox"/> <b>If you have had more than five antibiotic prescriptions in the past year, please check this box.</b> <span style="float: right;">HMI076 FMT_YES_NO.</span> |                                                                     |                                                        |

8a. Are you currently using probiotic supplements? *Specifically, we are referring to pills containing healthy bacteria.*

- Yes
- No → Go to question 9, page 12 HMI080 FMT\_YES\_NO.
- Don't know → Go to question 9, page 12

8b. When was the last time you took the probiotic supplement?

- Today or   number of days ago HMI085 FMT\_NUMERIC.

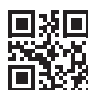



9. In the past 12 months, have you taken a proton pump inhibitor? *Proton pump inhibitors are drugs that suppress the production of acid in your stomach. Some examples of trade (generic) names are: Aciphex<sup>®</sup> (rabeprazole), Protonix<sup>®</sup> (pantoprazole), Nexium<sup>®</sup> (esomeprazole), Prevacid<sup>®</sup> (lansoprazole), Kapidex<sup>®</sup> (dexlansoprazole), Zegerid<sup>®</sup> (omeprazole/sodium bicarbonate), Prilosec<sup>®</sup> (omeprazole), Dexilant<sup>®</sup> (dexlansoprazole).*

- Yes
- No
- Don't know

HMI090 FMT\_YES\_NO.

10. Has a doctor or other health care provider ever told you that you had an infection with a drug-resistant germ? *A germ is resistant when one or more drugs ordinarily used to treat an infection with that germ cannot kill it.*

- Yes → *Specify the infection(s) you had below.*

HMI100 FMT\_YES\_NO.

|        |             |
|--------|-------------|
| HMI105 | \$FMT_CHAR. |
|--------|-------------|

- No
- Don't know

11. Has a doctor or other health care provider ever told you that you got an infection from a hospital or health care setting?

- Yes → *Specify the infection(s) you had below.*

HMI110 FMT\_YES\_NO.

|        |             |
|--------|-------------|
| HMI115 | \$FMT_CHAR. |
|--------|-------------|

- No
- Don't know

12. Have you ever been put in isolation as a patient in a hospital, nursing home, or inpatient rehabilitation facility? *That is, visitors were required to wear at least a pair of gloves and gown before seeing you.*

- Yes
- No
- Don't know

HMI120 FMT\_YES\_NO.

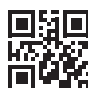

## Housing Characteristics

The next section asks questions about your home and your exposure to certain hazards in the home.

### 1. When was this home or building originally built?

- HOQ040\_R3
- Before 1900
  - 1901 to 1950
  - 1951 to 1978
  - 1979 to 1990
  - 1991 and after
  - Don't know

HOQ040\_R3 FMT\_HOQ040\_R2\_.

### 2. How long have you lived at this address?

- HOQ060\_R3
- 0-1 years
  - 1-3 years
  - 3-10 years
  - >10 years

HOQ060\_R3 FMT\_HOQ060\_R2\_.

### 3. What kind of pets do you keep inside your home now? *Fill in all that apply.*

- HOQ250\_R2
- None
  - Cat
  - Dog
  - Bird
  - Hamster, mice, guinea pig, gerbils
  - Reptile
  - Fish
  - Other

HOQ250\_R2\_A FMT\_YES\_NO.  
HOQ250\_R2\_B FMT\_YES\_NO.  
HOQ250\_R2\_C FMT\_YES\_NO.  
HOQ250\_R2\_D FMT\_YES\_NO.  
HOQ250\_R2\_E FMT\_YES\_NO.  
HOQ250\_R2\_F FMT\_YES\_NO.  
HOQ250\_R2\_G FMT\_YES\_NO.  
HOQ250\_R2\_H FMT\_YES\_NO.

### 4. Do you have a basement in this home?

- HOQ066\_R2
- Yes
  - No

HOQ066\_R2 FMT\_YES\_NO.

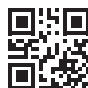

**5. What is the main type of heating system in this home?**

- HOQ067\_R2
- Steam radiators
  - Hot water radiators / heaters
  - Forced air system using gas or fuel oil
  - Active solar
  - Wood burning stoves
  - Portable electric space heaters
  - Other types of space heaters

Other: *Print below.*

Don't know

HOQ067\_R2 FMT\_HOQ067\_R2\_  
HOQ067\_OTHER\_R2 \$FMT\_CHAR.

**6. Is your home connected to a private well or to a community water supply?**

- HOQ070\_R2
- Private well
  - Community water supply → **Go to question 8**
  - Don't know → **Go to question 8**

HOQ070\_R2 FMT\_HOQ070\_R2\_.

**7. Approximately how deep is your well?**

- HOQ075\_R2
- < 50 feet
  - 50-99 feet
  - 100-149 feet
  - > 150 feet
  - Don't know

HOQ075\_R2 FMT\_HOQ075\_.

**8. Do you use a home water filter/treatment system in the home for drinking water?**

- HOQ080\_R2
- Yes
  - No → **Go to question 10, page 38**
  - Don't know → **Go to question 10, page 38**

HOQ080\_R2 FMT\_YES\_NO.

**9. Are any of these water filter/treatment systems in your home? *Fill in all that apply.***

- HOQ083\_R2
- Brita or other pitcher with water filter
  - Ceramic or charcoal filter
  - Water softener
  - Aerator
  - Reverse osmosis
  - None of these are in our home

Other: *Print below.*

Don't know

HOQ083\_R2\_A FMT\_YES\_NO.  
HOQ083\_R2\_B FMT\_YES\_NO.  
HOQ083\_R2\_C FMT\_YES\_NO.  
HOQ083\_R2\_D FMT\_YES\_NO.  
HOQ083\_R2\_E FMT\_YES\_NO.  
HOQ083\_R2\_F FMT\_YES\_NO.  
HOQ083\_R2\_G FMT\_YES\_NO.  
HOQ083\_R2\_OTHER \$FMT\_CHAR.

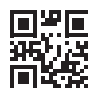

This next section is about chemicals, such as insecticides and weed killers, that may have been used outside or inside your home. These products could have been used by you, another household member, a landlord, or a company.

10. During the last 12 months, how often were weed killers or insecticides used on the foundation, yard/lawn, flowers, vegetables, or fruit trees *outside* your house?

- HOQ261\_R2
- 0 times
  - 1 time
  - 2-3 times
  - 4-10 times
  - > 10 times
  - Don't know

HOQ261\_R2 FMT\_HOQ261\_R2\_.

11. During the last 12 months, how often were chemicals such as pesticides used inside your home to kill or control insects or other pests?

- HOQ266\_R2
- 0 times → Go to question 1, page 39
  - 1 time
  - 2-3 times
  - 4-10 times
  - > 10 times
  - Don't know

HOQ266\_R2 FMT\_HOQ261\_R2\_.

12. Which rooms in your home were treated with this product? *Fill in all that apply.*

- HOQ270\_R2
- Kitchen
  - Bathroom
  - Living room or family room
  - Bedroom
  - Laundry room
  - Basement

Other: *Print below.*

Don't know

|                 |             |
|-----------------|-------------|
| HOQ270_R2_A     | FMT_YES_NO. |
| HOQ270_R2_B     | FMT_YES_NO. |
| HOQ270_R2_C     | FMT_YES_NO. |
| HOQ270_R2_D     | FMT_YES_NO. |
| HOQ270_R2_E     | FMT_YES_NO. |
| HOQ270_R2_F     | FMT_YES_NO. |
| HOQ270_R2_G     | FMT_YES_NO. |
| HOQ270_R2_OTHER | \$FMT_CHAR. |

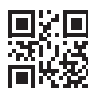

**INSURANCE, ACCESS, UTILIZATION (IUQ)**

IUQ010pre The next questions are about health insurance and your use of the health care system.

**INTERVIEWER: HIT ENTER TO CONTINUE**

IUQ010 During the last 12 months, how many months did you have health insurance?

**(INTERVIEWER: IF NO INSURANCE DURING 12 PRECEDING MONTHS, ENTER "0".)**

**IUQ010**

**FMT\_NUMERIC.**

<0-12> MONTHS (If 0, skip to IUQ012. If 12, skip to IUQ020\_R2. Otherwise, go to IUQ015.)

<d> DON'T KNOW (Skip to IUQ015)

<r> REFUSED (Skip to IUQ015)

IUQ012 If you wanted to, could you be covered by health insurance through a job or through a household family member's job? That is, do you or a household family member parent or spouse have an employer that offers health insurance?

<1> EMPLOYER (EITHER YOURS OR FAMILY MEMBER'S) OFFERS HEALTH INSURANCE **(SKIP TO IUQ014)**

**IUQ012**

**FMT\_IUQ012\_.**

<2> EMPLOYER (EITHER YOURS OR FAMILY MEMBER'S) **DOES NOT OFFER HEALTH INSURANCE (GO TO IUQ013)**

<d> DON'T KNOW **(GO TO IUQ013)**

<r> REFUSED **(GO TO IUQ013)**

IUQ013 Did you consider purchasing individual health insurance through the new health care program, known as the "Affordable Care Act" or "Obamacare," that allows many individuals to purchase subsidized insurance through the Marketplace?

Would you say yes, but it was too expensive because you did not qualify for a subsidy, yes, but it was too expensive even with a subsidy, you were not eligible to purchase through the marketplace, or you did not consider purchasing coverage through the Marketplace?

**(INTERVIEWER: HAND CARD)**

**IUQ013**

**FMT\_IUQ013\_.**

<1> YES, BUT IT WAS TOO EXPENSIVE BECAUSE I DID NOT QUALIFY FOR A SUBSIDY **(SKIP TO IUQ100)**

<2> YES, BUT IT WAS TOO EXPENSIVE EVEN WITH A SUBSIDY **(SKIP TO IUQ100)**

<3> I WAS NOT ELIGIBLE TO PURCHASE THROUGH THE MARKETPLACE **(SKIP TO IUQ100)**

<4> I DID NOT CONSIDER PURCHASING COVERAGE THROUGH THE MARKETPLACE **(SKIP TO IUQ100)**

**INSURANCE, ACCESS, UTILIZATION (IUQ)**

- <d> DON'T KNOW **(SKIP TO IUQ100)**  
 <r> REFUSED **(SKIP TO IUQ100)**

IUQ014 Why don't you have health insurance coverage from that employer? You are not eligible for the health insurance plan, it is too expensive and you cannot afford the premiums, or you do not think it is worth it?

- <1> I AM NOT ELIGIBLE FOR THE HEALTH INSURANCE PLAN **(SKIP TO IUQ100)**  
 <2> IT IS TOO EXPENSIVE – CANNOT AFFORD THE PREMIUMS **(SKIP TO IUQ100)**  
 <3> I DO NOT THINK IT IS WORTH IT **(Skip to IUQ100)**
- <d> DON'T KNOW **(SKIP TO IUQ100)**  
 <r> REFUSED **(SKIP TO IUQ100)**

IUQ014

FMT\_IUQ014\_.

IUQ015 Do you currently have health insurance?

- <1> YES **(GO TO IUQ020\_R2)**  
 <2> NO **(GO TO IUQ020\_R2)**
- <d> DON'T KNOW **(SKIP TO IUQ100)**  
 <r> REFUSED **(SKIP TO IUQ100)**

IUQ015

FMT\_YES\_NO.

IUQ020\_R2 What kinds of health insurance or health care coverage do you have now, or did you have during the last 12 months? In answering this question, please EXCLUDE plans that pay for only one type of service, such as nursing home care, accidents, family planning, or dental care, and plans that only provide extra cash when hospitalized.

**(INTERVIEWER: HAND CARD. ENTER ALL THAT APPLY.)**

- <1> EMPLOYER OR UNION SPONSORED PLAN **[GOTO IUQ021]**  
 <2> PRIVATE INDIVIDUALLY PURCHASED HEALTH PLAN **[GOTO IUQ025]**  
 <3> MEDICARE, FOR PEOPLE 65 OR OLDER OR PEOPLE WITH CERTAIN DISABILITIES **[GOTO IUQ030]**
- <5> MEDICAID, MEDICAL ASSISTANCE, MA, BADGER CARE, BADGER CARE PLUS **[GOTO IUQ030]**
- <8> INDIAN HEALTH SERVICE **[GOTO IUQ030]**  
 <9> MILITARY CARE (TRICARE/VA/CHAMP-VA) **[GOTO IUQ030]**  
 <10> OTHER PLAN (SPECIFY) **[GOTO IUQ025]**
- <d> DON'T KNOW **[goto IUQ025]**  
 <r> REFUSED **[goto IUQ025]**

**INSURANCE, ACCESS, UTILIZATION (IUQ)**

HIT "x" TO EXIT

|                 |                 |
|-----------------|-----------------|
| IUQ020_R2_A     | FMT_IUQ020_R2_. |
| IUQ020_R2_B     | FMT_IUQ020_R2_. |
| IUQ020_R2_C     | FMT_IUQ020_R2_. |
| IUQ020_R2_D     | FMT_IUQ020_R2_. |
| IUQ020_R2_E     | FMT_IUQ020_R2_. |
| IUQ020_R2_F     | FMT_IUQ020_R2_. |
| IUQ020_R2_G     | FMT_IUQ020_R2_. |
| IUQ020_R2_H     | FMT_IUQ020_R2_. |
| IUQ020_R2_I     | FMT_IUQ020_R2_. |
| IUQ020_R2_J     | FMT_IUQ020_R2_. |
| IUQ020_R2_OTHER | FMT_CHAR R2_.   |

IUQ021 Do you get the Employer or Union Sponsored Plan coverage through your own job or from a family member's insurance plan?

<1> YOUR OWN JOB OR EMPLOYER

IUQ021 FMT\_IUQ021\_.

<2> A FAMILY MEMBER'S JOB OR EMPLOYER

<3> OTHER

<d> DON'T KNOW

<r> REFUSED

**[ALL RESPONSES AT IUQ021 GO TO IUQ023]**

IUQ023 Was your job based coverage purchased through the SHOP, Small Business Health Options Program?

<1> YES (IF IUQ020\_R2 = 2, 10, d, or r GO TO IUQ025, ELSE SKIP TO IUQ026)

IUQ023 FMT\_YES\_NO.

<2> NO (IF IUQ020\_R2 = 2, 10, d, or r GO TO IUQ025, ELSE SKIP TO IUQ030)

<d> DON'T KNOW (IF IUQ020\_R2 = 2, 10, d, or r GO TO IUQ025, ELSE SKIP TO IUQ030)

<r> REFUSED (IF IUQ020\_R2 = 2, 10, d, or r GO TO IUQ025, ELSE SKIP TO IUQ030)

IUQ025 The next questions ask about the new health care program, known as the Affordable Care Act or "Obamacare." As you may know, the health care law creates health insurance exchanges or marketplaces where people can shop for insurance on

**INSURANCE, ACCESS, UTILIZATION (IUQ)**

Healthcare.gov. Some people can get financial help in the form of a tax credit from the federal government to buy a health insurance policy through these marketplaces.

Did you or a family member buy your private health insurance plan from this Marketplace, healthcare.gov?

**IUQ025      FMT\_YES\_NO.**

<1> YES (**GO TO IUQ026**)

<2> NO (**SKIP TO IUQ030**)

<d> DON'T KNOW (**GO TO IUQ026**)

<r> REFUSED (**GO TO IUQ026**)

IUQ026

Do you know what kind of health plan you have? Bronze, silver, gold, platinum, catastrophic or are you not sure?

**IUQ026      FMT\_IUQ026\_.**

<1> BRONZE

<2> SILVER

<3> GOLD

<4> PLATINUM

<5> CATASTROPHIC

<6> NOT SURE

<d> DON'T KNOW

<r> REFUSED

IUQ027

Did you or your family member get a federal tax credit or subsidy to help with or reduce the costs of buying your health insurance plan?

<1> YES

<2> NO

**IUQ027      FMT\_YES\_NO.**

<d> DON'T KNOW

<r> REFUSED

IUQ030

Does your health insurance plan, including any supplemental coverage you might have, cover all of the costs, some of the costs, or none of the costs associated with prescription medications?

<1> ALL

<2> SOME

<3> NONE (**SKIP TO IUQ040**)

**IUQ030      FMT\_ALL\_SOME\_NONE.**

<d> DON'T KNOW

<r> REFUSED



**INSURANCE, ACCESS, UTILIZATION (IUQ)**

IUQ035 Is this prescription drug coverage through your regular plan or through a supplemental insurance program for prescription drug coverage?

**(INTERVIEWER: ENTER ALL THAT APPLY)**

- <1> REGULAR PLAN
- <2> SUPPLEMENTAL, MEDICARE PART D
- <3> SUPPLEMENTAL, WISCONSIN SENIOR CARE
- <4> SUPPLEMENTAL, OTHER (SPECIFY)

- <d> DON'T KNOW
- <r> REFUSED

HIT 'x' TO EXIT

|              |              |
|--------------|--------------|
| IUQ035_A     | FMT_IUQ035_. |
| IUQ035_B     | FMT_IUQ035_. |
| IUQ035_C     | FMT_IUQ035_. |
| IUQ035_D     | FMT_IUQ035_. |
| IUQ035_OTHER | FMT_CHAR.    |

IUQ040 Does your insurance plan cover all of the costs, some of the costs, or none of the costs associated with preventive dental services including oral exam, cleaning, sealant, etc.?

- <1> ALL (SKIP TO IUQ050)
- <2> SOME (GO TO IUQ044)
- <3> NONE (GO TO IUQ044)

- <d> DON'T KNOW
- <r> REFUSED

|        |                    |
|--------|--------------------|
| IUQ040 | FMT_ALL_SOME_NONE. |
|--------|--------------------|

IUQ044 If your health insurance plan did not cover all of the costs, do you have a separate dental plan that pays for preventive services?

- <1> YES
- <2> NO

|        |             |
|--------|-------------|
| IUQ044 | FMT_YES_NO. |
|--------|-------------|

- <d> DON'T KNOW
- <r> REFUSED

IUQ050 Does your health insurance plan cover all of the costs, some of the costs, or none of the costs associated with other preventive services for adults, like checkups, immunizations, and screenings?

- <1> ALL
- <2> SOME
- <3> NONE

|        |                    |
|--------|--------------------|
| IUQ050 | FMT_ALL_SOME_NONE. |
|--------|--------------------|

- <d> DON'T KNOW
- <r> REFUSED

**INSURANCE, ACCESS, UTILIZATION (IUQ)**

IUQ070 Does your plan require you to sign up with a certain primary care doctor, group of doctors, or a certain clinic that you must go to for all of your routine care?

<1> YES

<2> NO

**IUQ070 FMT\_YES\_NO.**

<d> DON'T KNOW

<r> REFUSED

IUQ100 In the last 12 months, have you used the internet to seek information or advice on your health, or that of your family?

<1> YES

<2> NO

**IUQ100 FMT\_YES\_NO.**

<d> DON'T KNOW

<r> REFUSED

IUQ105 In the last 12 months, have you telephoned a health care professional to discuss a health problem or question related to yourself or your family?

<1> YES

<2> NO

**IUQ105 FMT\_YES\_NO.**

<d> DON'T KNOW

<r> REFUSED

IUQ110 In the last 12 months, have you emailed a health care professional to discuss a health problem or question related to yourself or your family?

<1> YES

<2> NO

**IUQ110 FMT\_YES\_NO.**

<d> DON'T KNOW

<r> REFUSED

IUQ115 How often do you need to have someone help you when you read instructions, pamphlets, or other written material from your doctor or pharmacy?

Would you say never, rarely, sometimes, often or always?

<1> NEVER

<2> RARELY

<3> SOMETIMES

<4> OFTEN

<5> ALWAYS

**IUQ115 FMT\_FREQ\_IUQ115\_.**

<d> DON'T KNOW

<r> REFUSED

**INSURANCE, ACCESS, UTILIZATION (IUQ)**

IUQ120 Do you have a usual place where you go when you feel sick or need advice about your health?

**(INTERVIEWER: HAND CARD)**

**IUQ120** **FMT\_IUQ120\_.**  
**IUQ120\_OTHER** **FMT\_CHAR.**

- <1> YES, I USUALLY GO TO A HOSPITAL EMERGENCY ROOM
- <2> YES, I USUALLY GO TO A HOSPITAL OUTPATIENT DEPARTMENT
- <3> YES, I USUALLY GO TO A CLINIC OR DOCTOR'S OFFICE
- <4> YES, I USUALLY GO TO A COMMUNITY HEALTH CENTER
- <5> YES, I USUALLY GO TO SOME OTHER PLACE (SPECIFY)
- <6> NO, I DON'T HAVE A USUAL PLACE OF CARE **(Skip to IUQ140)**
  
- <d> DON'T KNOW
- <r> REFUSED

IUQ125 What is the name of the health facility you usually go to when you feel sick or need advice about your health and on what streets in what town/city is this facility located?

NAME: \_\_\_\_\_

STREET ON WHICH THE FACILITY IS LOCATED: \_\_\_\_\_

NEAREST INTERSECTING OR CROSS STREET: \_\_\_\_\_

TOWN/CITY: \_\_\_\_\_

**IUQ125\_A** **FMT\_CHAR.**  
**IUQ125\_C** **FMT\_CHAR.**  
**IUQ125\_D** **FMT\_CHAR.**  
**IUQ125\_B** **FMT\_CHAR.**

- <d> DON'T KNOW
- <r> REFUSED

IUQ128 When you go to this health facility, do you usually see a general doctor, a specialist doctor, a nurse practitioner or physician assistant or someone else?

- <1> GENERAL DOCTOR
- <2> SPECIALIST DOCTOR
- <3> NURSE PRACTITIONER/PHYSICIAN ASSISTANT
- <4> SOMEONE ELSE

- <d> DON'T KNOW
- <r> REFUSED

**IUQ128** **FMT\_IUQ128\_.**

IUQ130 When you go to this health facility ,do you usually see the same health care provider?

- <1> YES
- <2> NO **(SKIP TO IUQ140)**

**IUQ130** **FMT\_YES\_NO.**

- <d> DON'T KNOW
- <r> REFUSED

**INSURANCE, ACCESS, UTILIZATION (IUQ)**

IUQ137

What is the specialty of the health care provider you usually see?

&lt;1&gt; INTERNAL MEDICINE

IUQ137  
IUQ137\_OTHERFMT\_IUQ137\_  
FMT\_CHAR.

&lt;2&gt; FAMILY PRACTICE

&lt;3&gt; OBSTETRICS/GYNECOLOGY

&lt;4&gt; OTHER SPECIALIST (SPECIFY)

&lt;d&gt; DON'T KNOW

&lt;r&gt; REFUSED

IUQ140

Sometimes people take fewer medicines than their health care provider prescribed, or they don't have their prescription filled right away.

At any time during the last 12 months, have you taken less medicine than your doctor prescribed or not had your prescription filled **because of the cost**?

&lt;1&gt; YES

&lt;2&gt; NO

IUQ140

FMT\_YES\_NO.

&lt;d&gt; DON'T KNOW

&lt;r&gt; REFUSED

IUQ170

In the last 12 months, how many different **times** have you seen a mental health professional such as a psychologist, psychiatrist, counselor, or psychiatric nurse about a personal problem or a problem with alcohol or drugs?

&lt;0-76&gt; TIMES DURING PREVIOUS YEAR

IUQ170

FMT\_NUMERIC.

&lt;d&gt; DON'T KNOW

&lt;r&gt; REFUSED

IUQ180

In the last 12 months, how many different **times** did you go to a hospital emergency room for medical treatment for yourself?

&lt;0-76&gt; TIMES DURING PREVIOUS YEAR

IUQ180

FMT\_NUMERIC.

&lt;d&gt; DON'T KNOW

&lt;r&gt; REFUSED

IUQ190

In the last 12 months, how many different **times** were you a patient in a hospital for at least one night or longer?

&lt;0&gt; NO TIMES (skip to IUQ220)

&lt;1-76&gt; TIMES DURING PREVIOUS YEAR

IUQ190

FMT\_NUMERIC.

&lt;d&gt; DON'T KNOW (skip to IUQ220)

**INSURANCE, ACCESS, UTILIZATION (IUQ)**

<r> REFUSED (skip to IUQ220)

IUQ192 For each time you were in the hospital in the last 12 months, for how many days did you stay in the hospital? Begin with your most recent hospital stay and tell us about your stay for up to 5 hospital stays.

{stay 1} <1-30> DURATION

UNITS

{unit 1} <1> DAYS  
<2> MONTHS

|           |             |
|-----------|-------------|
| IUQ192_S1 | FMT_NUMCAT. |
| IUQ192_S2 | FMT_NUMCAT. |
| IUQ192_S3 | FMT_NUMCAT. |
| IUQ192_S4 | FMT_NUMCAT. |
| IUQ192_S5 | FMT_NUMCAT. |

<d> DON'T KNOW  
<r> REFUSED

|           |                  |
|-----------|------------------|
| IUQ192_U1 | FMT_DAYS_MONTHS. |
| IUQ192_U2 | FMT_DAYS_MONTHS. |
| IUQ192_U3 | FMT_DAYS_MONTHS. |
| IUQ192_U4 | FMT_DAYS_MONTHS. |
| IUQ192_U5 | FMT_DAYS_MONTHS. |

**STAY #1 @s1 DURATION @u1 UNIT (Will display number given in IUQ190)**

**STAY #2 @s2 DURATION @u2 UNIT**

**STAY #3 @s3 DURATION @u3 UNIT**

**STAY #4 @s4 DURATION @u4 UNIT**

**STAY #5 @s5 DURATION @u5 UNIT**

IUQ194 For any of your hospitalizations in the last 12 months, how many times [endif]were you in an intensive care unit?

<0> NO

<1> YES <1-[fill IUQ190]> TIMES [maximum is number of hospitalizations in

**IUQ190]**

<d> DON'T KNOW  
<r> REFUSED

|        |             |
|--------|-------------|
| IUQ194 | FMT_NUMCAT. |
|--------|-------------|

IUQ200 How would you rate the quality of the care you received when you were most recently a patient in a hospital for at least one night or longer **during the last year?**

Would you say it was excellent, very good, good, fair or poor?

<1> EXCELLENT  
<2> VERY GOOD  
<3> GOOD  
<4> FAIR  
<5> POOR

|        |             |
|--------|-------------|
| IUQ200 | FMT_EVGGFP. |
|--------|-------------|

<d> DON'T KNOW  
<r> REFUSED

IUQ220 How long has it been since you last saw a doctor or health care provider for a

**INSURANCE, ACCESS, UTILIZATION (IUQ)**

routine physical exam, check-up or screening procedure?

<0> NEVER **(SKIP TO IUQ260pre)**  
 <1-76> ENTER NUMBER **(Go to IUQ230)**

|          |             |
|----------|-------------|
| IUQ220_N | FMT_NUMCAT. |
| IUQ220_U | FMT_FREQ.   |

<d> DON'T KNOW **(Go to IUQ225)**  
 <r> REFUSED **(Skip to IUQ230)**

<1> DAYS **(Skip to IUQ230)**  
 <2> WEEKS **(Skip to IUQ230)**  
 <3> MONTHS **(Skip to IUQ230)**  
 <4> YEARS **(If more than 1 year, skip to IUQ260pre. Otherwise skip to IUQ230)**

IUQ225

Has it been never, 6 months or less, more than 6 months but no more than 1 year ago, more than 1 year ago but no more than 3 years ago or more than 3 years ago?

|        |                  |
|--------|------------------|
| IUQ225 | FMT_IUQ225_255_. |
|--------|------------------|

<1> NEVER **(Skip to IUQ260pre)**  
 <2> 6 MONTHS OR LESS **(Go to IUQ230)**  
 <3> MORE THAN 6 MONTHS BUT NO MORE THAN 1 YEAR AGO **(GO TO IUQ230)**  
 <4> MORE THAN 1 YEAR BUT NO MORE THAN 3 YEARS AGO **(Skip to IUQ260pre)**  
 <5> MORE THAN 3 YEARS AGO **(Skip to IUQ260pre)**  
 <d> DON'T KNOW **(Skip to IUQ260pre)**  
 <r> REFUSED **(Skip to IUQ260pre)**

IUQ230

How would you rate the quality of the care you received when you last saw a doctor or health care provider for a routine physical exam, check-up, or screening procedure during the last year?

|        |             |
|--------|-------------|
| IUQ230 | FMT_EVGGFP. |
|--------|-------------|

Would you say it was excellent, very good, good, fair or poor?

<1> EXCELLENT  
 <2> VERY GOOD  
 <3> GOOD  
 <4> FAIR  
 <5> POOR

<d> DON'T KNOW  
 <r> REFUSED

IUQ260pre

The next questions are about your **overall** level of satisfaction with quality and access to health care.

**INSURANCE, ACCESS, UTILIZATION (IUQ)****INTERVIEWER: HIT ENTER TO CONTINUE**

IUQ260\_R2 Sometimes people have problems getting health care when they need it. During the last 12 months, was there any time that you felt that you needed medical care or surgery but did not get it?

<1> YES (Go to IUQ265)  
<2> NO (Skip to IUQ270)

IUQ260\_R2 FMT\_YES\_NO.

<d> DON'T KNOW (Skip to IUQ270)  
<r> REFUSED (Skip to IUQ270)

IUQ265 What was the main reason you didn't get the health care you needed?

IUQ265 FMT\_IUQ265\_  
IUQ265\_OTHER \$FMT\_CHAR.

**(INTERVIEWER: HAND CARD)**

<1> I couldn't afford health care  
<2> My insurance company wouldn't approve, cover or pay for care  
<3> My insurance company required a referral but I couldn't get one  
<4> The doctor (or clinic) refused to accept my insurance plan  
<5> Medical care was too far away  
<6> It was too expensive to get to health care  
<7> I couldn't get there when the doctor's office was open  
<8> It took too long to get an appointment  
<9> I couldn't get through on the telephone to make an appointment  
<10> The waiting list was too long  
<11> Other (Specify)

<d> DON'T KNOW  
<r> REFUSED

IUQ270 In the past 12 months, did you experience **delay** in obtaining any type of health care?

IUQ270 FMT\_YES\_NO.

<1> YES  
<2> NO (Skip to IUQ280)

<d> DON'T KNOW (Skip to IUQ280)  
<r> REFUSED (Skip to IUQ280)

IUQ275 What was the main reason for the difficulty or delay in obtaining health care?

**(INTERVIEWER: HAND CARD)**

IUQ275 FMT\_IUQ275\_.

<1> I couldn't afford health care  
<2> My insurance company wouldn't approve, cover or pay for care  
<3> My insurance company required a referral but I couldn't get one  
<4> The doctor refused to accept my insurance plan

**INSURANCE, ACCESS, UTILIZATION (IUQ)**

- <5> Medical care was too far away
- <6> It was too expensive to get to health care
- <7> I couldn't get there when the doctor's office was open
- <8> It took too long to get an appointment
- <9> I couldn't get through on the telephone to make an appointment
- <10> The waiting list was too long
- <11> Other (Specify)
  
- <d> DON'T KNOW
- <r> REFUSED

IUQ280 Overall, how would you rate the quality of the health care you received during the last 12 months?

**(INTERVIEWER: HAND CARD)**

**IUQ280**

**FMT\_EVGGFP.**

Would you say it was excellent, very good, good, fair, poor or you did not receive any care?

- <1> EXCELLENT
- <2> VERY GOOD
- <3> GOOD
- <4> FAIR
- <5> POOR
- <6> NOT APPLICABLE (DID NOT RECEIVE ANY CARE)
  
- <d> DON'T KNOW
- <r> REFUSED

IUQ290 Overall, how satisfied were you with **the way** health care services were provided during the last 12 months?

**(INTERVIEWER: HAND CARD)**

**IUQ290**

**FMT\_SATIS\_5CAT.**

Were you very satisfied, somewhat satisfied, neither satisfied nor dissatisfied, somewhat dissatisfied, very dissatisfied or you did not receive any care?

- <1> VERY SATISFIED
- <2> SOMEWHAT SATISFIED
- <3> NEITHER SATISFIED NOR DISSATISFIED
- <4> SOMEWHAT DISSATISFIED
- <5> VERY DISSATISFIED
- <6> NOT APPLICABLE (DID NOT RECEIVE ANY CARE)
  
- <d> DON'T KNOW
- <r> REFUSED

**IUQ300** I want to hear you read as many words as you can from this list. Begin with the first word and read aloud. When you come to a word you cannot read, do the best you can or say, 'blank' and go onto the next word.



**INSURANCE, ACCESS, UTILIZATION (IUQ)****IUQ300****FMT\_NUMERIC.**

**INTERVIEWER: HAND CARD AND RECORD THE NUMBER OF CORRECT PRONUNCIATIONS**

**IF THE RESPONDENT TAKES MORE THAN FIVE SECONDS ON A WORD, POINT TO THE NEXT WORD, IF NECESSARY, TO MOVE THE SUBJECT ALONG. IF THE SUBJECT BEGINS TO MISS EVERY WORD, HAVE HIM OR HER PRONOUNCE ONLY KNOWN WORDS.**

Menopause

Antibiotics

Exercise

Jaundice

Rectal

Anemia

Behavior

<0-7> CORRECT PRONUNCIATIONS

<d> DON'T KNOW

<r> REFUSED



Laboratory Tests (LAB)

LAB300 Did the participant attempt to donate any samples for the Wisconsin Microbiome Study?

- <1> YES (go to LAB310)
- <2> NO (Skip to LAB410)

LAB300\_FMT\_YES\_NO.

LAB310 Type: Nasal Swab

- Status:
- <d> DONE
  - <f> FAILED [goto LAB320]
  - <r> REFUSED [goto LAB320]
  - <na> NOT ATTEMPTED [goto LAB320]

LAB310\_S\_FMT\_LAB\_STATUS.

Collection Time: (Military time)  
HH:MM

LAB310\_C\_HHMM5.

Refrigeration Time: (Military time)  
HH:MM

LAB310\_R\_HHMM5.

LAB320 Type: Oropharyngeal Swab

- Status:
- <d> DONE
  - <f> FAILED [goto LAB330]
  - <r> REFUSED [goto LAB330]
  - <na> NOT ATTEMPTED [goto LAB330]

LAB320\_S\_FMT\_LAB\_STATUS.

Collection Time: (Military time)  
HH:MM

LAB320\_C\_HHMM5.

Refrigeration Time: (Military time)  
HH:MM

LAB320\_R\_HHMM5.

LAB330 Type: Saliva Cup

- Status:
- <d> DONE
  - <f> FAILED [goto LAB340]
  - <r> REFUSED [goto LAB340]
  - <na> NOT ATTEMPTED [goto LAB340]

LAB330\_S\_FMT\_LAB\_STATUS.

Collection Time: (Military time)  
HH:MM

LAB330\_C\_HHMM5.

Refrigeration Time: (Military time)  
HH:MM

LAB330\_R\_HHMM5.

LAB340 Type: Axilla/Groin Swab

Status:

LAB340\_S\_FMT\_LAB\_STATUS.

**Laboratory Tests (LAB)**

- <d> DONE
- <f> FAILED [**goto LAB341**]
- <r> REFUSED [**goto LAB341**]
- <na> NOT ATTEMPTED [**goto LAB341**]

Collection Time: (Military time) **LAB340\_C HHMM5.**  
 HH:MM

Refrigeration Time: (Military time) **LAB340\_R HHMM5.**  
 HH:MM

LAB341 What under-arm product do you most often use?

- <1> DEODORANT ALONE
- <2> ANTIPERSPIRANT ALONE
- <3> DEODORANT/ANTIPERSPIRANT COMBINATION
- <4> I USE NO PRODUCTS UNDER MY ARM [**GO TO LAB350**]
- <5> OTHER PRODUCT, PLEASE SPECIFY

---

<d> DON'T KNOW      <r> REFUSED      **LAB341\_FMT\_LAB341\_.**

LAB342 How often do you use the product above?

- <1> LESS THAN ONCE A MONTH
- <2> A FEW TIMES A MONTH
- <3> A FEW TIMES A WEEK
- <4> EVERY DAY

<d> DON'T KNOW      <r> REFUSED      **LAB342\_FMT\_LAB342\_.**

LAB350 **Stool Sample**

Status: **LAB350\_FMT\_LAB\_STATUS.**

- <d> DONE
- <i> INCOMPLETE – GAVE SHIPPER (**skip to LAB410**)
- <r> REFUSED (**skip to LAB410**)

LAB360 When was the stool sample produced?

<d> Don't know      <r> Refused  
 Date: **LAB360\_DATE DATE.**  
 MM/DD/YYYY

Time: (Military time) **LAB360\_TIME HHMM5.**  
 HH:MM

LAB370 When was the stool sample first refrigerated?

<d> Don't know      <r> Refused

**Laboratory Tests (LAB)**

Date: **LAB370\_DATE DATE.**  
MM/DD/YYYY

Time: (Military time) **LAB370\_TIME HHMM5.**  
HH:MM

LAB380 When was sample received by phlebotomist:

Date: **LAB380\_DATE DATE.**  
MM/DD/YYYY

Time: (Military time) **LAB380\_TIME HHMM5.**  
HH:MM

LAB390 Time placed in refrigerator or cooler: (Military time)  
HH:MM

**LAB390\_TIME HHMM5.**

LAB400 When were samples removed from cooler and mailed?

Date: **LAB400\_DATE DATE.**  
MM/DD/YYYY

Time: (Military time) **LAB400\_TIME HHMM5.**  
HH:MM

LAB410 Did the subject attempt to donate any samples for SHOW Core?

<1> YES (**Go to LAB010**)

<2> NO (**Skip to 250**)

**LAB410 FMT\_YES\_NO.**

LAB010 Check for any of the follow that restricted your choice of arm/vein:  
**(CHECK ALL THAT APPLY, ENTER 'x' WHEN DONE)**

- <1> Mastectomy **LAB010\_A FMT\_LAB010\_.**
- <2> Hematoma **LAB010\_B FMT\_LAB010\_.**
- <3> Burns, Scars, Tattoos **LAB010\_C FMT\_LAB010\_.**
- <4> Damaged veins **LAB010\_D FMT\_LAB010\_.**
- <5> Shunt, Fistula or Graft **LAB010\_E FMT\_LAB010\_.**
- <6> Recent IV **LAB010\_F FMT\_LAB010\_.**
- <7> Caste **LAB010\_G FMT\_LAB010\_.**
- <8> Edema **LAB010\_H FMT\_LAB010\_.**
- <9> Obesity **LAB010\_I FMT\_LAB010\_.**
- <10> Skin sores **LAB010\_J FMT\_LAB010\_.**

LAB040

When was the last time you ate or drank anything other than plain water?

**[INTERVIEWER: THIS QUESTION ELICITS THE LAST TIME THE SP ATE OR DRANK ANYTHING AND DETERMINES FASTING TIME. SPS ARE ALLOWED**

**Laboratory Tests (LAB)**

TO CONSUME DIET SODA, BLACK COFFEE, OR TEA WITH ARTIFICIAL SWEETENERS LIKE SWEET'N LOW, NUTRASWEET, EQUAL, OR SPLENDA SINCE THESE HAVE NO EFFECT ON STUDY ANALYTES.

PARTICIPANTS ARE NOT ALLOWED TO HAVE CONSUMED: COFFEE OR TEA WITH CREAM OR SUGAR, FLAVORED WATER, ALCOHOL, GUM, MINTS, LOZENGES, COUGH DROPS, COLD REMEDIES, ANTACIDS, ANTI-DIARRHEALS, LAXATIVES, OR DIETARY SUPPLEMENTS SUCH AS VITAMINS AND MINERALS.]

Last Ate:  
<d> Don't know <r> Refused

Date: **LAB040\_DATE DATE**  
MM/DD/YYYY

Time: (Military time) **LAB040\_TIME HHMM5.**  
HH:MM

LAB050 1<sup>ST</sup> Draw Attempt TIME  
(Military time)  
<d> Don't know <r> Refused

HH:MM

Draw Time: **LAB050 HHMM5.**  
HH:MM

LAB060 Type: **5mL SST Gold top for ML**

ML Label: **[ALLOW 9 CHARACTERS]**

Status: **LAB060 FMT\_LAB\_STATUS.**

- <d> DONE
- <f> FAILED
- <p> PARTIAL
- <r> REFUSED
- <na> NOT ATTEMPTED

QC: <1> Checked <2> Unchecked

Comments?  
<1> Enter Comments  
<2> No Comments

**Laboratory Tests (LAB)**

LAB070 Type: **10mL Redtop for Repository 1**

SPID Label (**SCAN**):

Status:

**LAB070 FMT\_LAB\_STATUS.**

- <d> DONE
- <f> FAILED
- <p> PARTIAL
- <r> REFUSED
- <na> NOT ATTEMPTED

QC: <1> Checked    <2> Unchecked

Comments?

- <1> Enter Comments
- <2> No Comments

LAB080 Type: **10mL Redtop for Repository 2**

SPID Label (**SCAN**): **[FILL FROM LAB070]**

Status:

**LAB080 FMT\_LAB\_STATUS.**

- <d> DONE
- <f> FAILED
- <p> PARTIAL
- <r> REFUSED
- <na> NOT ATTEMPTED

QC: <1> Checked    <2> Unchecked

Comments?

- <1> Enter Comments
- <2> No Comments

LAB090 Type: **10 mL Lavender 1**

SPID Label (**SCAN**): **[FILL FROM LAB070]**

Status:

**LAB090 FMT\_LAB\_STATUS.**

- <d> DONE
- <f> FAILED
- <p> PARTIAL
- <r> REFUSED
- <na> NOT ATTEMPTED

NO DNA: <1> Checked    <2> Unchecked

QC: <1> Checked    <2> Unchecked

**Laboratory Tests (LAB)**

Comments?

<1> Enter Comments

<2> No Comments

LAB100 Type: **10 mL Lavender 2**

SPID Label (SCAN): **[FILL FROM LAB070]**

Status:

**LAB100 FMT\_LAB\_STATUS.**

<d> DONE

<f> FAILED

<p> PARTIAL

<r> REFUSED

<na> NOT ATTEMPTED

NO DNA: <1> Checked <2> Unchecked

QC: <1> Checked <2> Unchecked

Comments?

<1> Enter Comments

<2> No Comments

LAB110 Type: **3 mL Lavender for ML 1**

ML Label:

Status:

**LAB110 FMT\_LAB\_STATUS.**

<d> DONE

<f> FAILED

<p> PARTIAL

<r> REFUSED

<na> NOT ATTEMPTED

QC: <1> Checked <2> Unchecked

Comments?

<1> Enter Comments

<2> No Comments

LAB120 Type: **3 mL Lavender for ML 2**

ML Label:



**Laboratory Tests (LAB)**

Status: **LAB120 FMT\_LAB\_STATUS.**

- <d> DONE
- <f> FAILED
- <p> PARTIAL
- <r> REFUSED
- <na> NOT ATTEMPTED

QC: <1> Checked    <2> Unchecked

Comments?

- <1> Enter Comments
- <2> No Comments

LAB125    Type: **2.5 mL PaxGene Redtop for Biorepository**

SPID Label: **[FILL FROM LAB070]**

Status: **LAB125 FMT\_LAB\_STATUS.**

- <d> DONE
- <f> FAILED
- <r> REFUSED
- <na> NOT ATTEMPTED

QC: <1> Checked    <2> Unchecked

Comments?

- <1> Enter Comments
- <2> No Comments

LAB130    **Number of Attempted Sticks**

Status: **LAB130    FMT\_NUMERIC.**

- <1-10> ATTEMPTS
- <f> FAILED
- <r> REFUSED
- <na> NOT ATTEMPTED

Comments?

- <1> Enter Comments
- <2> No Comments

LAB140    END DRAW TIME **LAB140    HHMM5.**  
(Military time)

<d> Don't know    <r> Refused

HH:MM

**Laboratory Tests (LAB)**

|        |                                                  |                                   |
|--------|--------------------------------------------------|-----------------------------------|
| LAB150 | Plasma Centrifuge Start Time:<br>(Military time) | <b>LAB150</b> <b>HHMM5.</b>       |
|        | <d> Don't know <r> Refused                       |                                   |
|        | Blood: HH:MM                                     |                                   |
| LAB155 | Serum Centrifuge Start Time:<br>(Military time)  | <b>LAB155</b> <b>HHMM5.</b>       |
|        | <d> Don't know <r> Refused                       |                                   |
|        | HH:MM                                            |                                   |
| LAB160 | Number of plasma vials:                          | <b>LAB160</b> <b>FMT_NUMERIC.</b> |
|        | <0-30> CRYOVIALS                                 |                                   |
|        | <d> Don't know <r> Refused                       |                                   |
| LAB170 | Number of serum vials:                           | <b>LAB170</b> <b>FMT_NUMERIC.</b> |
|        | <0-30> CRYOVIALS                                 |                                   |
|        | <d> Don't know <r> Refused                       |                                   |
| LAB180 | Plasma Freezer Entry Time<br>(Military time)     | <b>LAB180</b> <b>HHMM5.</b>       |
|        | <d> Don't know <r> Refused                       |                                   |
|        | HH:MM                                            |                                   |
| LAB185 | Serum Freezer Entry Time<br>(Military time)      | <b>LAB185</b> <b>HHMM5.</b>       |
|        | <d> Don't know <r> Refused                       |                                   |
|        | HH:MM                                            |                                   |
| LAB200 | Type: <b>Urine Sample</b>                        |                                   |
|        | SPID Label: <b>[FILL FROM LAB070]</b>            |                                   |

Laboratory Tests (LAB)

Status: LAB200 FMT\_LAB\_STATUS.  
<1> DONE

<7> REFUSED (goto LAB235)  
<8> FAILED (goto LAB235)  
<9> NOT ATTEMPTED (goto LAB235)

Comments?  
<1> Enter Comments  
<2> No Comments

LAB190 Urine Sample Collection time (Military time) LAB190 HHMM5.

<d> Don't know <r> Refused

HH:MM

Urine Sample Centrifuge Time HH:MM LAB191 HHMM5.

LAB210 Urine Sample LAB210 FMT\_NUMERIC.

<0-50> mL of urine centrifuged

<d> Don't know  
<r> Refused

LAB220 Number of urine vials: LAB220 FMT\_NUMERIC.

<0-30> CRYOVIALS

<d> Don't know <r> Refused

QC: <1> Checked <2> Unchecked

LAB230 Urine Freezer Time (Military time) LAB230 HHMM5.

HH:MM

<d> Don't know <r> Refused

LAB235 BLOOD SPOTS  
SPID Label:

### Laboratory Tests (LAB)

Blood Spot Status: **LAB235 FMT\_LAB\_STATUS.**  
 <d> DONE <r> REFUSED (Skips to LAB240)  
 <f> FAILED (skips to LAB240) <na> NOT ATTEMPTED-BLOOD  
 DRAW COMPLETED (Skip to LAB240)

Blood Spot Collection Time **LAB235\_TIM1 HHMM5.**  
 (Military time)

HH:MM

Blood Spot Freezer Time **LAB235\_TIM2 HHMM5.**  
 (Military time)

HH:MM

Number of spots completed on card  
 <0-8> **LAB235\_NBS FMT\_NUMERIC.**  
 <d> Don't know <r> Refused

LAB236 Blood Spots Comments?  
 <1> Enter Comments  
 <2> No Comments

LAB240 Saliva Sample  
 SPID Label: **[FILL FROM LAB070]**

Saliva Status: **LAB240\_A FMT\_LAB\_STATUS.**  
 <d> DONE <r> REFUSED  
 <f> FAILED <na> NOT ATTEMPTED-BLOOD DRAW COMPLETED

Saliva Collection Time **LAB240 HHMM5.**  
 (Military time)

HH:MM

Saliva Freezer Time **LAB241 HHMM5.**  
 (Military time)

HH:MM

QC: <1> Checked <2> Unchecked

LAB250 Problems/Comments **LAB250 \$FMT\_CHAR.**  
 <1> Enter Comments

**Laboratory Tests (LAB)**

<2> No Comments

PART160 Was the 24 Hour Dietary Recall completed?  
<1> YES  
<2> NO, REFUSED  
<3> PENDING PARTICIPATION

**OCCUPATION (OCQ)**

OCQ1pre In this part of the survey I will ask you questions about your work experience

**INTERVIEWER: HIT ENTER TO CONTINUE**

OCQ100 Which of the following were you doing **last week?**

**(INTERVIEWER: HAND CARD.)**

- <1> Working at a job or business **(Skip to OCQ125)**
- <2> With a job or business but not at work (for example, on vacation or sick)  
**(Skip to OCQ120)**
- <3> Not working but looking for work **(Go on to OCQ110)**
- <4> Not working at a job or business and not looking for a job  
**(Go on to OCQ110)**
  
- <d> DON'T KNOW **(Skip to PAQ200pre )**
- <r> REFUSED **(Skip to PAQ200pre )**

**OCQ100**

**FMT\_OCQ100\_.**

OCQ110 What is the main reason you are not in the paid workforce?

- <1> TAKING CARE OF HOUSE OR FAMILY
- <2> GOING TO SCHOOL
- <3> RETIRED
- <4> UNABLE TO WORK FOR HEALTH REASONS
- <5> ON LAYOFF
- <6> DISABLED
- <7> OTHER (INTERVIEWER: SPECIFY RESPONSE FOLLOWED BY //)
  
- <d> DON'T KNOW
- <r> REFUSED

**OCQ110**

**FMT\_OCQ110.**

**OCQ110\_OTHER**

**\$FMT\_CHAR.**

OCQ115 How long have you been out of the paid workforce?

- <1-76> ENTER NUMBER OF WEEKS, MONTHS, OR YEARS
- <666> NEVER WORKED FOR PAY
  
- <d> DON'T KNOW
- <r> REFUSED

**OCQ115\_N**

**FMT\_NUMCAT.**

- <2> WEEKS
- <3> MONTHS

**OCCUPATION (OCQ)**

&lt;4&gt; YEARS

**OCQ115\_U****FMT\_FREQ.****[SKIP TO PAQ200pre AFTER OCQ115]**OCQ120 What is the **main** reason you did not work **last week**?

- <1> VACATION / LEAVE
- <2> SICK OR TAKING CARE OF SICK FAMILY MEMBER
- <3> CHILDCARE PROBLEMS
- <4> EMPLOYER DID NOT SCHEDULE ME
- <4> OTHER (INTERVIEWER: SPECIFY RESPONSE FOLLOWED BY //)
- <d> DON'T KNOW
- <r> REFUSED

**OCQ120****FMT\_OCQ120\_.****OCQ120\_OTHER****\$FMT\_CHAR.**OCQ122 Do you **usually** work 35 hours or more per week in total at all jobs or businesses?

- <1> YES
- <2> NO
- <d> DON'T KNOW
- <r> REFUSED

**OCQ122****FMT\_YES\_NO.****[SKIP TO OCQ130p AFTER OCQ122]**OCQ125 How many hours did you work **last week** at **all** jobs or businesses?

&lt;1-168&gt; HOURS WORKED LAST WEEK

- <d> DON'T KNOW
- <r> REFUSED

**OCQ125****FMT\_NUMERIC.**OCQ127 Do you **usually** work 35 hours or more per week in total at all jobs or businesses?

- <1> YES
- <2> NO
- <d> DON'T KNOW
- <r> REFUSED

**OCQ127****FMT\_YES\_NO.**

**OCCUPATION (OCQ)**

OCQ130p I'm going to ask you some questions about your currently held job. If you have more than one job, please answer these questions thinking only of the job which is the primary source of your income.

**INTERVIEWER: HIT ENTER TO CONTINUE**

OCQ130 What kind of work do you do for pay?

**(INTERVIEWER: DO NOT PROBE. ENTER JOB TITLE OR WHATEVER THEY TELL YOU.)**

<1> ENTER RESPONSE FOLLOWED BY //

<d> DON'T KNOW

<r> REFUSED

|                    |                          |
|--------------------|--------------------------|
| <b>OCQ130</b>      | <b>FMT_OCQ_TEXTCODE.</b> |
| <b>OCQ130_TEXT</b> | <b>\$FMT_CHAR.</b>       |

OCQ140 What are your most important activities or duties on this job or business?

(For example: sells cars, keeps account books, operates printing press, finished concrete.)

**(INTERVIEWER: USE ACTIVE PROBES AS NECESSARY TO GET A CLEAR PICTURE OF WHAT THEY DO ON THEIR JOB.)**

<1> ENTER RESPONSE FOLLOWED BY //

<d> DON'T KNOW

<r> REFUSED

|                    |                          |
|--------------------|--------------------------|
| <b>OCQ140</b>      | <b>FMT_OCQ_TEXTCODE.</b> |
| <b>OCQ140_TEXT</b> | <b>\$FMT_CHAR.</b>       |



**OCCUPATION (OCQ)**

OCQ150 What kind of business or industry is this?

(For example: TV and radio management, retail shoe store, state labor department, farm.)

**(INTERVIEWER: USE ACTIVE PROBES AS NECESSARY TO GET A CLEAR PICTURE OF THE INDUSTRY IN WHICH THEY WORK. INCLUDE THE NAME OF THE BUSINESS, JOB OR INDUSTRY)**

<1> ENTER RESPONSE FOLLOWED BY //

<d> DON'T KNOW

<r> REFUSED

|                    |                          |
|--------------------|--------------------------|
| <b>OCQ150</b>      | <b>FMT_OCQ_TEXTCODE.</b> |
| <b>OCQ150_TEXT</b> | <b>\$FMT_CHAR.</b>       |

OCQ160 Is this mainly manufacturing, wholesale trade, retail trade or something else?

<1> MANUFACTURING (MAKING A PRODUCT)

<2> WHOLESALE (SELLING TO BUSINESSES)

<3> RETAIL (SELLING TO CONSUMERS)

<4> SOMETHING ELSE (FOR EXAMPLE: EDUCATION, TRANSPORTATION, GOVERNMENT, HEALTHCARE, AGRICULTURE, MINING, INSURANCE, BANKING, ENTERTAINMENT, REAL ESTATE, SERVICES, ETC.)

<d> DON'T KNOW

<r> REFUSED

|               |                         |
|---------------|-------------------------|
| <b>OCQ160</b> | <b>FMT_OCQ160_225_.</b> |
|---------------|-------------------------|

OCQ170 Looking at this card, which of these **best** describes this job or work situation?

**(INTERVIEWER: HAND CARD)**

<1> An employee of a **private** company, business, or individual for wages, salary or commission

<2> A **federal** government employee

<3> A **state** government employee

<4> A **local** government employee

<5> Self-employed in **own** business, professional practice or farm

<6> Working **without pay** in family business or farm

<d> DON'T KNOW

<r> REFUSED

|               |                         |
|---------------|-------------------------|
| <b>OCQ170</b> | <b>FMT_OCQ170_226_.</b> |
|---------------|-------------------------|

**OCCUPATION (OCQ)**

OCQ175 On average, how many hours per week do you work at this job?

<1-168> HOURS PER WEEK

<d> DON'T KNOW

<r> REFUSED

**OCQ175**

**FMT\_NUMERIC.**

OCQ180 At any time over the past year, have you worked in agriculture? For example farming, livestock production, commercial fishing, or forestry.

<1> YES

<2> NO

<d> DON'T KNOW

<r> REFUSED

**OCQ180**

**FMT\_YES\_NO.**

OCQ185 At any time over the past year, have you worked or volunteered in a setting that provides healthcare to patients?

**(INTERVIEWER: HAND CARD)**

For example: medical clinic, doctor's office, dentist's office, hospital, nursing home or some other health-care facility. This includes emergency responders and public safety personnel, part-time and unpaid work in a health care facility as well as professional nursing care provided in the home. This also includes non-health care professionals, such as administrative staff, who work in a health-care facility.

<1> YES

<2> NO **[Skip or go to OCQ14010pre]**

<d> DON'T KNOW

<r> REFUSED **[Skip or go to OCQ14010pre]**

**OCQ185**

**FMT\_YES\_NO.**

OCQ186 Did you provide direct patient care as part of your routine? By direct patient care, we mean physical or hands on contact with patients?

<1> YES

<2> NO

<d> DON'T KNOW

**OCCUPATION (OCQ)**

<r> REFUSED

**OCQ186** **FMT\_YES\_NO.**

OCQ14010pre Many people shop, exercise, and run errands near where they work. To better understand the resources that might be available to you, we would now like to collect information about your job.

**INTERVIEWER: HIT ENTER TO CONTINUE**

OCQ14010 What is the address of your current place of employment?

<1> ENTER ADDRESS (goto STREET)  
<99> WORKS FROM HOME (**SKIP TO PAQ200pre**)

**OCQ14010\_1** **FMT\_OCQ14010\_1\_.**

<d> DON'T KNOW (**GO TO OCQ14020**)  
<r> REFUSED (**GO TO OCQ14020**)

STREET \_\_\_\_\_  
**OCQ14010\_A** **\$FMT\_CHAR.**

CITY \_\_\_\_\_  
**OCQ14010\_B** **\$FMT\_CHAR.**

ZIPCODE \_\_\_\_\_  
**OCQ14010\_C** **\$FMT\_CHAR.**

OCQ14020 How many miles is your current place of employment from your home?

<0-300> MILES

<d> DON'T KNOW  
<r> REFUSED

**OCQ14020** **FMT\_NUMERIC.**

## Depression diagnostic and Severity Measure (PHQ)

PHQ001 Please indicate how much you have been bothered by these problems.

This section will take about 5 minutes.

Enter **1** to continue.

**<1> CONTINUE**

PHQ010 Over the **past 2** weeks, how often have you been bothered by any of the following problems:

Little interest or pleasure in doing things?

Would you say not at all, several days, more than half the days, or nearly every day?

Enter **1** for **not at all**, **2** for **several days**, **3** for **more than half the days**, or **4** for **nearly every day**.

**<1> NOT AT ALL**

**PHQ010 FMT\_PHQ\_OFTEN.**

**<2> SEVERAL DAYS**

**<3> MORE THAN HALF THE DAYS**

**<4> NEARLY EVERY DAY**

**<d> DON'T KNOW <r> REFUSED**

**<q> REPLAY QUESTION <h> REPLAY RESPONSES**

**<y> TURN QUESTION AUDIO OFF (SOUND IS NOW **ON**)**

**<s> TURN RESPONSE AUDIO OFF (SOUND IS NOW **ON**)**

PHQ020 Over the **past 2** weeks, how often have you been bothered by any of the following problems:

Feeling down, depressed, or hopeless?

Would you say not at all, several days, more than half the days, or nearly every day?

Enter **1** for **not at all**, **2** for **several days**, **3** for **more than half the days**, or **4** for **nearly every day**.

**<1> NOT AT ALL**

**PHQ020 FMT\_PHQ\_OFTEN.**

**<2> SEVERAL DAYS**

**<3> MORE THAN HALF THE DAYS**

**<4> NEARLY EVERY DAY**

**<d> DON'T KNOW <r> REFUSED**

**<q> REPLAY QUESTION <h> REPLAY RESPONSES**

## **Depression diagnostic and Severity Measure (PHQ)**

- <y> TURN QUESTION AUDIO OFF (SOUND IS NOW **ON**)
- <s> TURN RESPONSE AUDIO OFF (SOUND IS NOW **ON**)

## PTSD Checklist

Below is a list of problems and complaints that people sometimes have in response to stressful life experiences.

Please read each one below, and fill in the circle to indicate how much you have been bothered by the problem in the last month.

|                                                                                                            | Not at<br>all         | A little<br>bit       | Moderately            | Quite a<br>bit        | Extremely             |
|------------------------------------------------------------------------------------------------------------|-----------------------|-----------------------|-----------------------|-----------------------|-----------------------|
| 1. Repeated disturbing memories, thoughts, or images of a stressful experience from the past.....          | <input type="radio"/> | <input type="radio"/> | <input type="radio"/> | <input type="radio"/> | <input type="radio"/> |
|                                                                                                            |                       |                       | PTSD01_R2             |                       | FMT_PTSD.             |
| 2. Feeling very upset when something reminded you of a stressful experience from the past.....             | <input type="radio"/> | <input type="radio"/> | <input type="radio"/> | <input type="radio"/> | <input type="radio"/> |
|                                                                                                            |                       |                       | PTSD04_R2             |                       | FMT_PTSD.             |
| 3. Avoided activities or situations because they reminded you of a stressful experience from the past..... | <input type="radio"/> | <input type="radio"/> | <input type="radio"/> | <input type="radio"/> | <input type="radio"/> |
|                                                                                                            |                       |                       | PTSD07_R2             |                       | FMT_PTSD.             |
| 4. Feeling distant or cut off from other people.....                                                       | <input type="radio"/> | <input type="radio"/> | <input type="radio"/> | <input type="radio"/> | <input type="radio"/> |
|                                                                                                            |                       |                       | PTSD10_R2             |                       | FMT_PTSD.             |
| 5. Having trouble falling or staying asleep.....                                                           | <input type="radio"/> | <input type="radio"/> | <input type="radio"/> | <input type="radio"/> | <input type="radio"/> |
|                                                                                                            |                       |                       | PTSD13_R2             |                       | FMT_PTSD.             |
| 6. Feeling irritable or having angry outbursts.....                                                        | <input type="radio"/> | <input type="radio"/> | <input type="radio"/> | <input type="radio"/> | <input type="radio"/> |
|                                                                                                            |                       |                       | PTSD14_R2             |                       | FMT_PTSD.             |
| 7. Difficulty concentrating.....                                                                           | <input type="radio"/> | <input type="radio"/> | <input type="radio"/> | <input type="radio"/> | <input type="radio"/> |
|                                                                                                            |                       |                       | PTSD15_R2             |                       | FMT_PTSD.             |

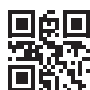

**PRESCRIPTION MEDICATIONS AND SELECT OTC DRUGS (RXQ)**

RXQ032pre Now I'd like to gather information about any medication you might be taking.

**INTERVIEWER: HIT ENTER TO CONTINUE**

RXQ032 In the **past 30 days**, have you used a **prescription medicine**? Include only those products prescribed by a health professional such as a doctor, a nurse practitioner or a dentist.

**RXQ032 FMT\_YES\_NO.**

<1> YES

<2> NO

**(Skip to RXQ296)**

<d> DON'T KNOW

**(Skip to RXQ296)**

<r> REFUSED

**(Skip to RXQ296)**

RXQ042 I'd like to see the CONTAINERS for **all** the prescription medicines that you used or took in the **past 30 days**.

**INTERVIEWER: ENTER THE NAME OF EACH DRUG FROM THE PRESCRIPTION BOTTLE UNTIL NO MORE PRESCRIPTION MEDICINES, THEN HIT X TO EXIT QUESTION**

<1> ENTER NAME(S)

<d> DON'T KNOW

<r> REFUSED

RXQ042@a\_\_\_\_\_

RXQ042@b\_\_\_\_\_

RXQ042@c\_\_\_\_\_

RXQ042@d\_\_\_\_\_

RXQ042@e\_\_\_\_\_

RXQ042@f\_\_\_\_\_

RXQ042@g\_\_\_\_\_

RXQ042@h\_\_\_\_\_

RXQ042@i\_\_\_\_\_

RXQ042@qq ARE THERE MORE PRESCRIPTION MEDICINES?

<1> YES

**(go to RXQ042@j)**

<2>

NO

**PRESCRIPTION MEDICATIONS AND SELECT OTC DRUGS (RXQ)**

**INTERVIEWER: ENTER THE NAME OF EACH DRUG FROM THE PRESCRIPTION BOTTLE UNTIL NO MORE PRESCRIPTION MEDICINES, THEN HIT X TO EXIT QUESTION**

RXQ042p2@j \_\_\_\_\_

RXQ042p2@k \_\_\_\_\_

RXQ042p2@l \_\_\_\_\_

RXQ042p2@m \_\_\_\_\_

RXQ042p2@n \_\_\_\_\_

RXQ042p2@o \_\_\_\_\_

RXQ042p2@p \_\_\_\_\_

RXQ042p2@q \_\_\_\_\_

RXQ042p2@r \_\_\_\_\_

RXQ042p2@s \_\_\_\_\_

RXQ042p2@t \_\_\_\_\_

|          |             |
|----------|-------------|
| RXQ042_A | \$FMT_CHAR. |
| RXQ042_B | \$FMT_CHAR. |
| RXQ042_C | \$FMT_CHAR. |
| RXQ042_D | \$FMT_CHAR. |
| RXQ042_E | \$FMT_CHAR. |
| RXQ042_F | \$FMT_CHAR. |
| RXQ042_G | \$FMT_CHAR. |
| RXQ042_H | \$FMT_CHAR. |
| RXQ042_I | \$FMT_CHAR. |
| RXQ042_J | \$FMT_CHAR. |
| RXQ042_K | \$FMT_CHAR. |
| RXQ042_L | \$FMT_CHAR. |
| RXQ042_M | \$FMT_CHAR. |
| RXQ042_N | \$FMT_CHAR. |
| RXQ042_O | \$FMT_CHAR. |
| RXQ042_P | \$FMT_CHAR. |
| RXQ042_Q | \$FMT_CHAR. |
| RXQ042_R | \$FMT_CHAR. |
| RXQ042_S | \$FMT_CHAR. |
| RXQ042_T | \$FMT_CHAR. |

RXQ231 Are there any **prescription medications** that you have used in the **past**



**PRESCRIPTION MEDICATIONS AND SELECT OTC DRUGS (RXQ)**

**30 days for which you no longer have a prescription bottle or container?**

Again, these are products prescribed by a health professional such as a doctor, a nurse practitioner or a dentist.

**RXQ231      FMT\_YES\_NO.**

- <1> YES
- <2> NO                                    **(Skip to RXQ294)**
- <d> DON'T KNOW                    **(Skip to RXQ294)**
- <r> REFUSED                           **(Skip to RXQ294)**

RXQ235      What is the name of each such drug?

**INTERVIEWER: ENTER THE NAME OF EACH DRUG UNTIL NO MORE DRUGS, THEN HIT X TO EXIT QUESTION**

- <1> ENTER NAME(S)
- <d> DON'T KNOW
- <r> REFUSED

RXQ235@a \_\_\_\_\_

RXQ235@b \_\_\_\_\_

RXQ235@c \_\_\_\_\_

RXQ235@d \_\_\_\_\_

RXQ235@e \_\_\_\_\_

RXQ235@f \_\_\_\_\_

RXQ235@g \_\_\_\_\_

RXQ235@h \_\_\_\_\_

RXQ235@i \_\_\_\_\_

RXQ235@qq            ARE THERE MORE PRESCRIPTION MEDICINES?

- <1> YES      **(go to RXQ235@j)**   <2> NO

**INTERVIEWER: ENTER THE NAME OF EACH DRUG UNTIL NO MORE DRUGS, THEN HIT X TO EXIT QUESTION**

RXQ235p2@j \_\_\_\_\_

**PRESCRIPTION MEDICATIONS AND SELECT OTC DRUGS (RXQ)**

RXQ235p2@k \_\_\_\_\_  
 RXQ235p2@l \_\_\_\_\_  
 RXQ235p2@m \_\_\_\_\_  
 RXQ235p2@n \_\_\_\_\_  
 RXQ235p2@o \_\_\_\_\_  
 RXQ235p2@p \_\_\_\_\_  
 RXQ235p2@q \_\_\_\_\_  
 RXQ235p2@r \_\_\_\_\_  
 RXQ235p2@s \_\_\_\_\_  
 RXQ235p2@t \_\_\_\_\_

|          |             |
|----------|-------------|
| RXQ235_A | \$FMT_CHAR. |
| RXQ235_B | \$FMT_CHAR. |
| RXQ235_C | \$FMT_CHAR. |
| RXQ235_D | \$FMT_CHAR. |
| RXQ235_E | \$FMT_CHAR. |
| RXQ235_F | \$FMT_CHAR. |
| RXQ235_G | \$FMT_CHAR. |
| RXQ235_H | \$FMT_CHAR. |
| RXQ235_I | \$FMT_CHAR. |
| RXQ235_J | \$FMT_CHAR. |
| RXQ235_K | \$FMT_CHAR. |
| RXQ235_L | \$FMT_CHAR. |
| RXQ235_M | \$FMT_CHAR. |
| RXQ235_N | \$FMT_CHAR. |
| RXQ235_O | \$FMT_CHAR. |
| RXQ235_P | \$FMT_CHAR. |
| RXQ235_Q | \$FMT_CHAR. |
| RXQ235_R | \$FMT_CHAR. |
| RXQ235_S | \$FMT_CHAR. |
| RXQ235_T | \$FMT_CHAR. |

RXQ294 Are there any other prescription medications that you used in the past 30 days?

**RXQ294 FMT\_YES\_NO.**

<1> YES  
 <2> NO  
  
 <d> DON'T KNOW  
 <r> REFUSED

**PRESCRIPTION MEDICATIONS AND SELECT OTC DRUGS (RXQ)**

**[Loop back to RXQ235 as many times as needed.]**

RXQ295 I have listed {TOTAL NUMBER} prescription medication(s) that you have taken in the **past 30 days**.

**(INTERVIEWER: REVIEW TOTAL NUMBER OF PRESCRIBED MEDICATIONS AND THEIR NAMES WITH RESPONDENT)**

**(INTERVIEWER: USE PAGE UP/DOWN TO NAVIGATE THROUGH THE MEDICATIONS).**

Is this correct?

**RXQ295 FMT\_YES\_NO.**

<1> YES

<2> NO (GO BACK TO ADD MEDICATION) **[goto RXQ042]**

RXQ296 In the last 30 days, have you taken any of the following types of over the counter, non-prescription drugs?

**(INTERVIEWER: ENTER ALL THAT APPLY. HAND CARD)**

- <1> No
- <2> Low dose aspirin to protect heart
- <3> Drugs for pain/analgesics (including regular dose aspirin, Motrin, Tylenol, etc.)
- <4> Allergy medications
- <5> Drugs to help stop smoking, including nicotine gum
- <6> Drugs for intestinal problems
- <8> Drugs for cold and cough
- <10> Drugs to help you lose or gain weight
- <11> Vitamins or minerals (including calcium supplements)
- <12> Other (Specify)

<d> DON'T KNOW

<r> REFUSED

|              |              |
|--------------|--------------|
| RXQ296_A     | FMT_RXQ296_. |
| RXQ296_B     | FMT_RXQ296_. |
| RXQ296_C     | FMT_RXQ296_. |
| RXQ296_D     | FMT_RXQ296_. |
| RXQ296_E     | FMT_RXQ296_. |
| RXQ296_F     | FMT_RXQ296_. |
| RXQ296_G     | FMT_RXQ296_. |
| RXQ296_H     | FMT_RXQ296_. |
| RXQ296_I     | FMT_RXQ296_. |
| RXQ296_OTHER | \$FMT_CHAR.  |

**PRESCRIPTION MEDICATIONS AND SELECT OTC DRUGS (RXQ)**

RXQ300pre The following questions are about your exposure to vitamin D from supplements.

**INTERVIEWER: HIT ENTER TO CONTINUE**

RXQ300 In the **past 30 days**, have you used any multivitamins, vitamin D supplements with or without calcium, or cod liver oil?

- <1> YES
- <2> NO (END QUESTIONNAIRE)
- <d> DON'T KNOW (END QUESTIONNAIRE)
- <r> REFUSED (END QUESTIONNAIRE)

**RXQ300 FMT\_YES\_NO.**

RXQ301 I'd like to see the CONTAINERS for any multivitamins, vitamin D supplements with or without calcium, or cod liver oil that you took in the **past 30 days**.

**INTERVIEWER: ENTER THE NAME OF EACH SUPPLEMENT FROM THE BOTTLE UNTIL NO MORE SUPPLEMENTS, THEN HIT X TO EXIT QUESTION**

- <1> ENTER NAME(S)
- <d> DON'T KNOW
- <r> REFUSED

RXQ301@a \_\_\_\_\_

RXQ301@b \_\_\_\_\_

RXQ301@c \_\_\_\_\_

RXQ301@d \_\_\_\_\_

RXQ301@e \_\_\_\_\_

RXQ301@f \_\_\_\_\_

**RXQ301\_A \$FMT\_CHAR.**  
**RXQ301\_B \$FMT\_CHAR.**  
**RXQ301\_C \$FMT\_CHAR.**  
**RXQ301\_D \$FMT\_CHAR.**  
**RXQ301\_E \$FMT\_CHAR.**  
**RXQ301\_F \$FMT\_CHAR.**

RXQ302 Are there any multivitamin, **vitamin D supplements or bottles of cod liver oil** that you have used in the **past 30 days for which you no longer have a bottle or container?**

**PRESCRIPTION MEDICATIONS AND SELECT OTC DRUGS (RXQ)**

<1> YES (GO TO RXQ 303)  
 <2> NO (SKIP TO RXQ304pre)

<d> DON'T KNOW (SKIP TO RXQ304pre)  
 <r> REFUSED (SKIP TO RXQ304pre)

RXQ302 FMT\_YES\_NO.

RXQ303 What is the name of each such supplement?

**INTERVIEWER: ENTER THE NAME OF EACH SUPPLEMENT UNTIL NO MORE SUPPLEMENTS, THEN HIT X TO EXIT QUESTION**

<1> ENTER NAME(S)  
 <d> DON'T KNOW  
 <r> REFUSED

RXQ303@a \_\_\_\_\_

RXQ303@b \_\_\_\_\_

RXQ303@c \_\_\_\_\_

RXQ303@d \_\_\_\_\_

RXQ303@e \_\_\_\_\_

RXQ303@f \_\_\_\_\_

RXQ303\_A \$FMT\_CHAR.  
 RXQ303\_B \$FMT\_CHAR.  
 RXQ303\_C \$FMT\_CHAR.  
 RXQ303\_D \$FMT\_CHAR.  
 RXQ303\_E \$FMT\_CHAR.  
 RXQ303\_F \$FMT\_CHAR.

**[if RXQ301@ ne <1> and RXQ303 ne <1> END SECTION]**

RXQ304pre For these questions, please only think about the last 30 days. Please answer each question as best you can, and estimate if you are not sure.

**INTERVIEWER: HIT ENTER TO CONTINUE**

RXQ304\_# In the last 30 days, on how many days per week have you taken [Fill drug name]?  
 Would you say none or less than 1 day per week, 1 day per week, 2 days per week, 3 to 4 days per week, 5 to 6 days per week or every day?

**(INTERVIEWER: HAND CARD)**

**PRESCRIPTION MEDICATIONS AND SELECT OTC DRUGS (RXQ)**

- <0> NONE OR LESS THAN 1 DAY PER WEEK  
 <1> 1 DAY PER WEEK  
 <2> 2 DAYS PER WEEK  
 <3> 3-4 DAYS PER WEEK  
 <5> 5-6 DAYS PER WEEK  
 <7> EVERY DAY
- <d> DON'T KNOW  
 <r> REFUSED

|          |              |
|----------|--------------|
| RXQ304_A | FMT_RXQ304_. |
| RXQ304_B | FMT_RXQ304_. |
| RXQ304_C | FMT_RXQ304_. |
| RXQ304_D | FMT_RXQ304_. |
| RXQ304_E | FMT_RXQ304_. |
| RXQ304_F | FMT_RXQ304_. |
| RXQ304_G | FMT_RXQ304_. |
| RXQ304_H | FMT_RXQ304_. |
| RXQ304_I | FMT_RXQ304_. |
| RXQ304_J | FMT_RXQ304_. |
| RXQ304_K | FMT_RXQ304_. |
| RXQ304_L | FMT_RXQ304_. |

RXQ305\_# **INTERVIEWER: ENTER THE SERVING SIZE (NUMBER OF PILLS OR CHEWS OR VOLUME OF LIQUID OR AMOUNT OF POWDER) ON THE SUPPLEMENT LABEL OF [fill drug name].**

<0.00 – 30.00> NUMBER (SERVING SIZE)

- <d> DON'T KNOW  
 <r> REFUSED

|           |              |
|-----------|--------------|
| RXQ305_A1 | FMT_NUMERIC. |
| RXQ305_B1 | FMT_NUMERIC. |
| RXQ305_C1 | FMT_NUMERIC. |
| RXQ305_D1 | FMT_NUMERIC. |
| RXQ305_E1 | FMT_NUMERIC. |
| RXQ305_F1 | FMT_NUMERIC. |
| RXQ305_G1 | FMT_NUMERIC. |
| RXQ305_H1 | FMT_NUMERIC. |
| RXQ305_I1 | FMT_NUMERIC. |
| RXQ305_J1 | FMT_NUMERIC. |
| RXQ305_K1 | FMT_NUMERIC. |
| RXQ305_L1 | FMT_NUMERIC. |

**THE UNIT FOR THE SERVING OF [fill drug name]:**

- <1> PILLS OR CHEWS  
 <2> VOLUME IN MLS OR CC  
 <3> VOLUME IN OUNCES (OZ)  
 <4> TEASPOON (TSP)  
 <5> TABLESPOON (TBSP)

**PRESCRIPTION MEDICATIONS AND SELECT OTC DRUGS (RXQ)**

<6> SCOOPS (POWDER)

<d> DON'T KNOW

<r> REFUSED

|           |              |
|-----------|--------------|
| RXQ305_A2 | FMT_RXQ305_. |
| RXQ305_B2 | FMT_RXQ305_. |
| RXQ305_C2 | FMT_RXQ305_. |
| RXQ305_D2 | FMT_RXQ305_. |
| RXQ305_E2 | FMT_RXQ305_. |
| RXQ305_F2 | FMT_RXQ305_. |
| RXQ305_G2 | FMT_RXQ305_. |
| RXQ305_H2 | FMT_RXQ305_. |
| RXQ305_I2 | FMT_RXQ305_. |
| RXQ305_J2 | FMT_RXQ305_. |
| RXQ305_K2 | FMT_RXQ305_. |
| RXQ305_L2 | FMT_RXQ305_. |

RXQ306\_# **INTERVIEWER: ENTER THE IU OF VITAMIN D PER SERVING ON THE SUPPLEMENT LABEL OF [Fill drug name]**

**(IF NONE, ENTER 0):**

<0-50,000> IU

<d> DON'T KNOW

<r> REFUSED

|          |              |
|----------|--------------|
| RXQ306_A | FMT_NUMERIC. |
| RXQ306_B | FMT_NUMERIC. |
| RXQ306_C | FMT_NUMERIC. |
| RXQ306_D | FMT_NUMERIC. |
| RXQ306_E | FMT_NUMERIC. |
| RXQ306_F | FMT_NUMERIC. |
| RXQ306_G | FMT_NUMERIC. |
| RXQ306_H | FMT_NUMERIC. |
| RXQ306_I | FMT_NUMERIC. |
| RXQ306_J | FMT_NUMERIC. |
| RXQ306_K | FMT_NUMERIC. |
| RXQ306_L | FMT_NUMERIC. |

RXQ307 On the days you took the {fill drug name}, how many {fill unit} did you take?

<1-30.00> {fill unit}

<d> DON'T KNOW

<r> REFUSED

|          |              |
|----------|--------------|
| RXQ307_A | FMT_NUMERIC. |
| RXQ307_B | FMT_NUMERIC. |
| RXQ307_C | FMT_NUMERIC. |

**PRESCRIPTION MEDICATIONS AND SELECT OTC DRUGS (RXQ)**

|                 |                     |
|-----------------|---------------------|
| <b>RXQ307_D</b> | <b>FMT_NUMERIC.</b> |
| <b>RXQ307_E</b> | <b>FMT_NUMERIC.</b> |
| <b>RXQ307_F</b> | <b>FMT_NUMERIC.</b> |
| <b>RXQ307_G</b> | <b>FMT_NUMERIC.</b> |
| <b>RXQ307_H</b> | <b>FMT_NUMERIC.</b> |
| <b>RXQ307_I</b> | <b>FMT_NUMERIC.</b> |
| <b>RXQ307_J</b> | <b>FMT_NUMERIC.</b> |
| <b>RXQ307_K</b> | <b>FMT_NUMERIC.</b> |
| <b>RXQ307_L</b> | <b>FMT_NUMERIC.</b> |

**[REPEAT RXQ304 – RXQ307 for each drug listed at RXQ301 AND RXQ303]**



## Smoking and Other Tobacco Products

The next questions are about your history of using tobacco products.

1. **Have you smoked 100 or more cigarettes in your entire life?** SMQ020\_R2 FMT\_YES\_NO.  
 Yes       No → Go to question 11, page 21
  
2. **How old were you when you started smoking cigarettes regularly?** SMQ030\_R2. FMT\_NUMERIC.  
Enter age when you started smoking:
  
3. **Do you smoke cigarettes now?**  
 Yes       No → Go to question 9, page 21 SMQ040\_R2 FMT\_YES\_NO.
  
4. **Is your usual cigarette brand menthol or non-menthol?**  
 Menthol       Non-menthol SMQ045\_R2 FMT\_SMQ045\_.
  
5. **On average, when you smoked during the past 30 days, about how many cigarettes did you smoke per day? *If you smoked less than 1 cigarette per day, enter 1 (1 pack = 20 cigarettes).***  
Enter number of cigarettes per day:   SMQ050\_R2 FMT\_NUMERIC.
  
6. **For about how many years have you smoked this amount?**  
Enter number of years:   SMQ060\_R2 FMT\_NUMERIC.
  
7. **Would you like to completely quit smoking cigarettes?**  
 Yes       No SMQ064\_R2 FMT\_YES\_NO.
  
8. **During the past 12 months, has a doctor or other health professional talked to you about your smoking?**  
 Yes       No SMQ065\_R2 FMT\_YES\_NO.

Go to question 11, page 21 →

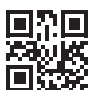

Please answer questions 9 and 10 *only if* you answered NO to question 3. Otherwise, begin with question 11.

9. How old were you when you stopped smoking?

Enter the age you stopped smoking:  SMQ120\_R2 FMT\_NUMERIC.

10. On average, over the entire time you smoked, about how many cigarettes did you smoke per day? *If you smoked less than 1 cigarette per day, enter 1 (1 pack = 20 cigarettes).*

Enter number of cigarettes daily:  SMQ140\_R2 FMT\_NUMERIC.

**Everyone should answer the following questions.**

Now think about a typical week.

11. How many hours per week are you currently exposed to cigarette smoke in social settings outside your own home? *(This would include time spent with friends or relatives who smoke, time spent in restaurants or taverns, or other social affairs where people are smoking.)*

Enter hours per week:  SMQ230\_R2 FMT\_NUMERIC.

12. Do any people currently smoke cigarettes inside your home?

Yes  No SMQ185\_R2 FMT\_YES\_NO.

The next questions are about your use of tobacco products other than cigarettes (such as cigars, pipes, water pipes, hookahs, very small cigars that look like cigarettes, bidis, or cigarillos).

13. Have you ever smoked tobacco products other than cigarettes? *(Do not include electronic cigarettes or e-cigarettes.)*

Yes  No SMQ233\_R2 FMT\_YES\_NO.

14. Do you now smoke tobacco products other than cigarettes every day, some days, or not at all?

Every day  
 Some days SMQ240\_R2 FMT\_SMQFREQ.  
 Not at all

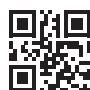

15. Have you ever used any smokeless tobacco products, such as chewing tobacco, snuff, snus, dip, orbs, sticks, or strips?

- Yes       No      SMQ250\_R2      FMT\_YES\_NO.

16. Do you now use any smokeless tobacco products, such as chewing tobacco, snuff, snus, dip, orbs, sticks, or strips?

- Every day      SMQ260\_R2      FMT\_SMQFREQ.  
 Some days  
 Not at all

17. In the past 12 months, how often has tobacco smoke entered your living space from somewhere else in or around your home (for example, from a neighbor)?

- Most of the time  
 Often      SMQ270\_R2      FMT\_SMQ270\_  
 Sometimes  
 Rarely  
 Never

18. During the past 7 days, on how many days did you ride in a vehicle where someone other than you was smoking tobacco? *If none, then enter 0.*

- Enter the number of days:  SMQ280\_R2      FMT\_NUMERIC.  
 Don't know

19. Not counting motorcycles, in the vehicles that you or your family members who live with you own or lease, is smoking...

- Always allowed in all vehicles      SMQ290\_R2      FMT\_SMQ290\_  
 Sometimes allowed in at least one vehicle  
 Never allowed in any vehicle  
 I/we don't own or lease a vehicle

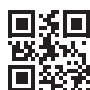

20. Have you ever used electronic cigarettes or e-cigarettes?

*An electronic cigarette, or e-cigarette, is a new product that looks like a regular cigarette, but is not lighted like a cigarette. It runs on a battery and has a smoke-like vapor that is produced electronically. The vapor contains nicotine, but the e-cigarette does not contain or burn any tobacco.*

- Yes       No      SMQ300\_R2      FMT\_YES\_NO.

21. Do you now use electronic cigarettes (e-cigarettes) every day, some days, or not at all?

- Every day      SMQ310\_R2      FMT\_SMQFREQ.  
 Some days  
 Not at all

22. Do you think secondhand smoke is...

- Very harmful to one's health  
 Somewhat harmful to one's health      SMQ320\_R2      FMT\_SMQ320\_  
 Not very harmful to one's health  
 Not harmful to one's health

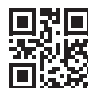

Supplement: bmjopen-2017-019450supp001.pdf [file bmjopen-2017-019450supp001.pdf]
